# Supplementary material
Source: publisher figshare collection journal article supplement (https://acs.figshare.com/ndownloader/files/24676590)
Supplement: Supplementary file 1 [file 24676590]

## Sheet: Summary
Supplementary Data 3 - Quartz sand-0.1% Tween 80-treated extracellular proteins
No of. identified proteins	Annotated components	Extra ratio
126	166	0.482

## Sheet: Quartz Tween-Protein Results
N	Unused	Total	%Cov	%Cov(50)	%Cov(95)	Accession	Name	Species	Peptides(95%)	Specturms	Specturm num.	Peptides	unique Peptides	unique Peptides num.	Mw	pI	GRAVY
1	312.23	312.23	77.5	71.45	65.64	tr|A0A2C9CHN2|A0A2C9CHN2_KUEST	Hydrazine synthase subunit A OS=Kuenenia stuttgartiensis OX=174633 GN=hzsA_1 PE=4 SV=1	KUEST	217	1.1.1.2975.1;1.1.1.2828.1;1.1.1.11691.1;1.1.1.8777.1;1.1.1.3089.1;1.1.1.10651.1;1.1.1.905.1;1.1.1.2662.1;1.1.1.11009.1;1.1.1.950.1;1.1.1.5733.1;1.1.1.6116.1;1.1.1.9170.1;1.1.1.1311.1;1.1.1.3479.1;1.1.1.7259.1;1.1.1.3744.1;1.1.1.11008.1;1.1.1.315.1;1.1.1.4697.1;1.1.1.780.1;1.1.1.9647.1;1.1.1.3942.1;1.1.1.11961.1;1.1.1.5966.1;1.1.1.6642.1;1.1.1.8733.1;1.1.1.11553.1;1.1.1.11435.1;1.1.1.6985.1;1.1.1.…	324	KVYDDPNWNDHQPAPVYVK;FDNDGNYKGVK(Deamidated(N)@6);FDNDGNYKGVK(Deamidated(N)@3; Carbamyl(K)@8);YEAELSANAPR(Deamidated(N)@8);PIYGNCDGEIGGTSGR(No Methylthio(C)@6);FDNDGNYKGVK(Carbamyl(K)@8);EPVMTGGPVQGK(Carbamyl@N-term);CAAGDKVYDDPNWNDHQPAPV(Methylthio(C)@1; Deamidated(N)@14);SPIYYAAGSIEEGEGR;DTTLSDQPVGPYPHQ;PIYGNCDGEIGGTSGR(Methylthio(C)@6);YGGPSGTTSQPVEGLTLDK;SGSPEGVMDEFHNPYA;EPVMTGGPVQGK(Oxidation…	KVYDDPNWNDHQPAPVYVK;FDNDGNYKGVK(Deamidated(N)@6);FDNDGNYKGVK(Deamidated(N)@3; Carbamyl(K)@8);PIYGNCDGEIGGTSGR(No Methylthio(C)@6);YEAELSANAPR(Deamidated(N)@8);FDNDGNYKGVK(Carbamyl(K)@8);EPVMTGGPVQGK(Carbamyl@N-term);SPIYYAAGSIEEGEGR;DTTLSDQPVGPYPHQ;CAAGDKVYDDPNWNDHQPAPV(Methylthio(C)@1; Deamidated(N)@14);PIYGNCDGEIGGTSGR(Methylthio(C)@6);YGGPSGTTSQPVEGLTLDK;SGSPEGVMDEFHNPYA;EPVMTGGPVQGK(Oxidation…	217	90244.4	6.25	-0.454
2	168.36	168.36	76.92	74.27	71.62	tr|A0A2C9CHM2|A0A2C9CHM2_KUEST	Hydrazine synthase subunit C OS=Kuenenia stuttgartiensis OX=174633 GN=hzsC_3 PE=4 SV=1	KUEST	128	1.1.1.8915.1;1.1.1.3317.1;1.1.1.12787.1;1.1.1.5334.1;1.1.1.9818.1;1.1.1.9191.1;1.1.1.2508.1;1.1.1.9362.1;1.1.1.3949.1;1.1.1.9967.1;1.1.1.12792.1;1.1.1.7964.1;1.1.1.11596.1;1.1.1.4709.1;1.1.1.8941.1;1.1.1.4636.1;1.1.1.4210.1;1.1.1.6177.1;1.1.1.4093.1;1.1.1.6367.1;1.1.1.9226.1;1.1.1.1250.1;1.1.1.4936.1;1.1.1.8004.1;1.1.1.12535.1;1.1.1.5883.1;1.1.1.3891.1;1.1.1.8053.1;1.1.1.9546.1;1.1.1.4780.1;1.1.1…	188	NNYDGNPYGMAMDPK;MSPDGSTLFISNQSGH(Deamidated(N)@12);VPTGLGPSSVCLSPDGK(Methylthio(C)@11);HITMSPDGSTL;ISNQSGHSVTFVDAR;AIDVIDTGRMEK;NYFSNNVTVIR(Deamidated(N)@5);NAESDSVSVVDIQR(Deamidated(N)@1);LDTVGSINR;DLNNYDGNPYGMAMDPK;VCNAESDSVSVVDIQR(Methylthio(C)@2);CEAENGQVFTNNVTIIETK(Methylthio(C)@1; Deamidated(N)@5; Deamidated(N)@11);VGDWPSGIKISPDGK(Carbamyl(K)@9);YDGNPYGMAMDPK;SSNLRDVVYTPDGK;AILDTVGSINR;EAEN…	NNYDGNPYGMAMDPK;VPTGLGPSSVCLSPDGK(Methylthio(C)@11);MSPDGSTLFISNQSGH(Deamidated(N)@12);HITMSPDGSTL;ISNQSGHSVTFVDAR;AIDVIDTGRMEK;NYFSNNVTVIR(Deamidated(N)@5);NAESDSVSVVDIQR(Deamidated(N)@1);LDTVGSINR;DLNNYDGNPYGMAMDPK;VCNAESDSVSVVDIQR(Methylthio(C)@2);CEAENGQVFTNNVTIIETK(Methylthio(C)@1; Deamidated(N)@5; Deamidated(N)@11);VGDWPSGIKISPDGK(Carbamyl(K)@9);YDGNPYGMAMDPK;SSNLRDVVYTPDGK;AILDTVGSINR;EAEN…	128	40750.4	5.59	-0.07
3	163.03	163.03	43.05	39.47	34.7	tr|Q1PYU4|Q1PYU4_KUEST	Uncharacterized protein OS=Kuenenia stuttgartiensis OX=174633 GN=kustd1514 PE=4 SV=1	KUEST	115	1.1.1.6259.1;1.1.1.9165.1;1.1.1.1535.1;1.1.1.4216.1;1.1.1.9405.1;1.1.1.1642.1;1.1.1.4766.1;1.1.1.1771.1;1.1.1.11859.1;1.1.1.4317.1;1.1.1.1337.1;1.1.1.3224.1;1.1.1.2299.1;1.1.1.628.1;1.1.1.1439.1;1.1.1.2547.1;1.1.1.6423.1;1.1.1.2273.1;1.1.1.5012.1;1.1.1.6763.1;1.1.1.4762.1;1.1.1.2621.1;1.1.1.7756.1;1.1.1.4991.1;1.1.1.4130.1;1.1.1.10509.1;1.1.1.3449.1;1.1.1.8209.1;1.1.1.8438.1;1.1.1.1618.1;1.1.1.19…	150	GLPSSSSNYAATGSK(Deamidated(N)@8);NTSHTGTETLLDDVFIQ;FANSEFNSTNR(Deamidated(N)@7);VSNTDNSLVWIIPK(Deamidated(N)@3);SVVDDDQNTTSGQDTLTDK;SVVDDDQNTTSGQDTLTDKLK;DENLNPVVR;HIMLVETGNNTGVF(Deamidated(N)@10);VRDDFSQEFQEVVS;AVDQSSDTGDTLSL;YNDSPSATAEDNSTNYR(Deamidated(N)@2; Deamidated(N)@12);TGELSVDKTTVDIND;DGTSVGTSSAIR(Dehydrated(T)@7);SVTDSSGNTTSSPDTITVTVR(Dehydrated(T)@3);TSHTGTETLLDDVFIQ;VRDDFSQEFQE;TTTGT…	NTSHTGTETLLDDVFIQ;GLPSSSSNYAATGSK(Deamidated(N)@8);FANSEFNSTNR(Deamidated(N)@7);SVVDDDQNTTSGQDTLTDKLK;VSNTDNSLVWIIPK(Deamidated(N)@3);SVVDDDQNTTSGQDTLTDK;DENLNPVVR;HIMLVETGNNTGVF(Deamidated(N)@10);VRDDFSQEFQEVVS;AVDQSSDTGDTLSL;YNDSPSATAEDNSTNYR(Deamidated(N)@2; Deamidated(N)@12);TGELSVDKTTVDIND;DGTSVGTSSAIR(Dehydrated(T)@7);SVTDSSGNTTSSPDTITVTVR(Dehydrated(T)@3);TSHTGTETLLDDVFIQ;TTTGTVQPNYR(Deami…	115	163443	4.39	-0.084
4	139.68	139.68	59.27	54.07	49.57	tr|Q1PYC5|Q1PYC5_KUEST	Hydrazine dehydrogenase OS=Kuenenia stuttgartiensis OX=174633 GN=hao PE=4 SV=1	KUEST	116	1.1.1.10377.1;1.1.1.11834.1;1.1.1.1584.1;1.1.1.10125.1;1.1.1.3564.1;1.1.1.7252.1;1.1.1.7921.1;1.1.1.4242.1;1.1.1.9281.1;1.1.1.10457.1;1.1.1.9603.1;1.1.1.3264.1;1.1.1.4794.1;1.1.1.8363.1;1.1.1.11687.1;1.1.1.7456.1;1.1.1.7519.1;1.1.1.6226.1;1.1.1.4692.1;1.1.1.3349.1;1.1.1.6396.1;1.1.1.7615.1;1.1.1.8614.1;1.1.1.12113.1;1.1.1.5073.1;1.1.1.9052.1;1.1.1.1260.1;1.1.1.8395.1;1.1.1.6973.1;1.1.1.8621.1;1.1…	185	ASIVYTSMGMSMADR;WVPHEVYGMPGEPDNSGK(Oxidation(M)@9);IGAYHDGEAYGGKTGESGEFR(Carbamyl(K)@13);VGISWQPEQFWK(Oxidation(W)@11);MSNVTDVERL;VAEDLLIDGVLDPMPK(Cation:Na(D)@8);LIDGVLDPMPK;WVPHEVYGMPGEPDN;KVGISWQPEQFWK(Carbamyl@N-term);SPYPGKY;QVNKWDTEQFDFSK(Gln->pyro-Glu@N-term; Oxidation(W)@5);QVNKWDTEQFDFSK(Dioxidation(W)@5);WDTEQFDFSKK;SMGMSMADR;DHRDWEAYDIGLHGTVY;ENLQAMDESVKDASLK(Glu->pyro-Glu@N-term; Deam…	MSNVTDVER(Oxidation(M)@1);IGAYHDGEAYGGKTGESGEFR(Carbamyl(K)@13);MSNVTDVERL;MSNVTDVER;IGAYHDGEAYGGK	5	65182.3	6.51	-0.674
5	121.18	121.18	79.32	64.02	59.77	sp|Q1Q0T3|HZSG_KUEST	Hydrazine synthase subunit gamma OS=Kuenenia stuttgartiensis OX=174633 GN=kuste2860 PE=1 SV=1	KUEST	103	1.1.1.1147.1;1.1.1.9514.1;1.1.1.6024.1;1.1.1.4562.1;1.1.1.6898.1;1.1.1.4048.1;1.1.1.473.1;1.1.1.4309.1;1.1.1.6622.1;1.1.1.12858.1;1.1.1.10795.1;1.1.1.3799.1;1.1.1.8411.1;1.1.1.849.1;1.1.1.8819.1;1.1.1.8882.1;1.1.1.7105.1;1.1.1.5644.1;1.1.1.8800.1;1.1.1.568.1;1.1.1.734.1;1.1.1.5399.1;1.1.1.13042.1;1.1.1.12672.1;1.1.1.6730.1;1.1.1.9095.1;1.1.1.12518.1;1.1.1.5693.1;1.1.1.11700.1;1.1.1.8629.1;1.1.1.5…	172	TLMDTINNTVNDKDMHGR(Oxidation(M)@3; Deamidated(N)@8);TLMDTINNTVNDKD(Deamidated(N)@11);LVKEFDTPTLR;GHPDEIVGATS;REEPLTVPEVHF;SGTYFHDGGAR;VISTIQTGATWEPLGREEPL;GQTTGLIWDLGDEGWGSWK(Oxidation(W)@8);ALEAGEDPYGVESNTPIIGLDLVKEFDTPTLR;YGQFQFNDAAWSL;GHPDEIVGATSSLDR;TLMDTINNTVNDKDMHGR(Deamidated(N)@7; Deamidated(N)@11);EEPLTVPEVHF;LGDEGWGSWK;TLMDTINNTVNDKDMHGR(Deamidated(N)@8);GDEGWGSWK;NADGSLTEAQK;TLMDTINNTV…	TLMDTINNTVNDKDMHGR(Oxidation(M)@3; Deamidated(N)@8);TLMDTINNTVNDKD(Deamidated(N)@11);LVKEFDTPTLR;GHPDEIVGATS;REEPLTVPEVHF;SGTYFHDGGAR;VISTIQTGATWEPLGREEPL;ALEAGEDPYGVESNTPIIGLDLVKEFDTPTLR;GQTTGLIWDLGDEGWGSWK(Oxidation(W)@8);GHPDEIVGATSSLDR;YGQFQFNDAAWSL;TLMDTINNTVNDKDMHGR(Deamidated(N)@7; Deamidated(N)@11);LGDEGWGSWK;EEPLTVPEVHF;TLMDTINNTVNDKDMHGR(Deamidated(N)@8);GDEGWGSWK;NADGSLTEAQK;TLMDTINNTV…	103	38924.9	6.08	-0.408
6	103.69	103.69	65.3	60.26	50.19	tr|Q1PX48|Q1PX48_KUEST	Similar to hydroxylamine oxidoreductase hao OS=Kuenenia stuttgartiensis OX=174633 GN=hao PE=1 SV=1	KUEST	86	1.1.1.11319.1;1.1.1.7462.1;1.1.1.9846.1;1.1.1.12010.1;1.1.1.4019.1;1.1.1.13131.1;1.1.1.6410.1;1.1.1.1451.1;1.1.1.8351.1;1.1.1.3387.1;1.1.1.1525.1;1.1.1.4068.1;1.1.1.9796.1;1.1.1.8578.1;1.1.1.1129.1;1.1.1.3330.1;1.1.1.6473.1;1.1.1.9913.1;1.1.1.6169.1;1.1.1.311.1;1.1.1.10715.1;1.1.1.1072.1;1.1.1.11468.1;1.1.1.9234.1;1.1.1.465.1;1.1.1.1436.1;1.1.1.475.1;1.1.1.7908.1;1.1.1.2445.1;1.1.1.1886.1;1.1.1.6…	119	TPTIVNDWK(Deamidated(N)@6);GNGSAFEQDR(Deamidated(N)@2);HGEYLDLLPGWKR;GMFQVDR;KPGDVDVEWFK;KLVEIKTE;WYDPEHYWTNGSQTE(Deamidated(N)@10);VGKPAEEVTGCAH(Methylthio(C)@11);RKPGDVDVEWFK(Carbamyl@N-term);WYDPEHYWT;GVVDPMPEGSAPDWY;TPTIVNDWK;HKFDPAEAR(Carbamyl@N-term);PHRANADAGVEIHH(Acetyl@N-term);ANADAGVEIHH(Delta:H(2)C(2)@N-term);KLEMPTYK;RANADAGVEIHH;AGGLGSHTHAY;TNGSQTEGVFK(Deamidated(N)@2);RKPGDVDVEWFK;W…	GNGSAFEQDR(Deamidated(N)@2);TPTIVNDWK(Deamidated(N)@6);HGEYLDLLPGWKR;GMFQVDR;KPGDVDVEWFK;KLVEIKTE;WYDPEHYWTNGSQTE(Deamidated(N)@10);VGKPAEEVTGCAH(Methylthio(C)@11);RKPGDVDVEWFK(Carbamyl@N-term);GVVDPMPEGSAPDWY;WYDPEHYWT;TPTIVNDWK;HKFDPAEAR(Carbamyl@N-term);PHRANADAGVEIHH(Acetyl@N-term);KLEMPTYK;ANADAGVEIHH(Delta:H(2)C(2)@N-term);RANADAGVEIHH;AGGLGSHTHAY;TNGSQTEGVFK(Deamidated(N)@2);RKPGDVDVEWFK;S…	86	60243.2	6.84	-0.545
7	84.55	84.55	54.44	36.32	29.09	tr|Q1PZD8|Q1PZD8_KUEST	Nitrite oxidoreductase subunit A OS=Kuenenia stuttgartiensis OX=174633 GN=narG PE=3 SV=1	KUEST	51	1.1.1.1905.1;1.1.1.3176.1;1.1.1.4193.1;1.1.1.4329.1;1.1.1.3302.1;1.1.1.7733.1;1.1.1.9339.1;1.1.1.3440.1;1.1.1.2229.1;1.1.1.2592.1;1.1.1.3316.1;1.1.1.10019.1;1.1.1.5798.1;1.1.1.7283.1;1.1.1.1825.1;1.1.1.6781.1;1.1.1.2704.1;1.1.1.9862.1;1.1.1.4275.1;1.1.1.4248.1;1.1.1.5169.1;1.1.1.10727.1;1.1.1.10988.1;1.1.1.4615.1;1.1.1.11171.1;1.1.1.5975.1;1.1.1.11043.1;1.1.1.11908.1;1.1.1.11002.1;1.1.1.5120.1;1.…	62	GYTAGNENDFMKK;GWVAEDVFKPN;REGPEATPYLPN;MPGVGEHQIH;AIHYGEGVNHYF;GDYVYVDANPADRPYE;VVVDNPLDTYPDRR;QDISDGPSYH;VVVDNPLDTYPDR;DLGIEDGDYVYVDANPADRPYE;TGYTAGNENDFMKK;GDQAPGHPFSHGLQTSDVDMNDVR;TGYTAGNENDFMK(Deamidated(N)@9);NAEYWEDR;LQAYNDEPEIIEYGENF;NYSDLYGNK;TGITPVYESKDDVK;AIVSTNPYIRPDDYGIPENAEYWEDR(Deamidated(N)@19);ALDEEVAYWNHSERPL(Deamidated(N)@10);QNYDHQNYSDLYGNK(Gln->pyro-Glu@N-term);LQTSDVDMNDVR;TS…	GYTAGNENDFMKK;GWVAEDVFKPN;REGPEATPYLPN;MPGVGEHQIH;AIHYGEGVNHYF;GDYVYVDANPADRPYE;VVVDNPLDTYPDRR;QDISDGPSYH;DLGIEDGDYVYVDANPADRPYE;VVVDNPLDTYPDR;TGYTAGNENDFMKK;GDQAPGHPFSHGLQTSDVDMNDVR;TGYTAGNENDFMK(Deamidated(N)@9);NAEYWEDR;LQAYNDEPEIIEYGENF;NYSDLYGNK;ALDEEVAYWNHSERPL(Deamidated(N)@10);TGITPVYESKDDVK;AIVSTNPYIRPDDYGIPENAEYWEDR(Deamidated(N)@19);QNYDHQNYSDLYGNK(Gln->pyro-Glu@N-term);LQTSDVDMNDVR;TS…	51	131729	8.57	-0.602
8	68.41	68.41	43.5	37	34.12	tr|Q1PVE0|Q1PVE0_KUEST	Similar to hydroxylamine oxidoreductase OS=Kuenenia stuttgartiensis OX=174633 GN=hao PE=4 SV=1	KUEST	40	1.1.1.9315.1;1.1.1.6816.1;1.1.1.6632.1;1.1.1.4839.1;1.1.1.6850.1;1.1.1.6447.1;1.1.1.4656.1;1.1.1.4177.1;1.1.1.5789.1;1.1.1.4797.1;1.1.1.8473.1;1.1.1.6002.1;1.1.1.5571.1;1.1.1.5755.1;1.1.1.3392.1;1.1.1.10067.1;1.1.1.4695.1;1.1.1.5575.1;1.1.1.1004.1;1.1.1.4536.1;1.1.1.4280.1;1.1.1.5249.1;1.1.1.4655.1;1.1.1.1387.1;1.1.1.7080.1;1.1.1.9187.1;1.1.1.9356.1;1.1.1.5135.1;1.1.1.6517.1;1.1.1.8287.1;1.1.1.49…	57	QDNPSDIENMYNR;LQMQDNPSDIENMYNR;MLDMYWQPNR(Oxidation(M)@1);NVGLSEGSGPFTK;LYPDAANRDPYPL;DMYWQPNR;SSLKDYPYGIK;FLQMQDNPSDIENMYNR(Deamidated(N)@13);EYTSSLKDYPYGIK;TEQKTEEIPPPDLYK;STPYLSSK;HYEPMENLDHSIFIEQER;YTSSLKDYPYGIK;KIDIYSEENVAK;NLDHSIFIEQER;GEPVYNAFK(Deamidated(N)@6);IYSEENVAK;IYEKEEEHYDFTKPLVE;MLDMYWQPNR;TEEIPPPDLYKDTPAWY;MQDNPSDIENMYNR;FLQMQDNPSDIENMYNR;TEEIPPPDLYKDTPAWYQ;IDIYSEENVAK;VYKDNVGLS…	QDNPSDIENMYNR;LQMQDNPSDIENMYNR;MLDMYWQPNR(Oxidation(M)@1);NVGLSEGSGPFTK;LYPDAANRDPYPL;DMYWQPNR;SSLKDYPYGIK;FLQMQDNPSDIENMYNR(Deamidated(N)@13);EYTSSLKDYPYGIK;TEQKTEEIPPPDLYK;STPYLSSK;HYEPMENLDHSIFIEQER;YTSSLKDYPYGIK;KIDIYSEENVAK;NLDHSIFIEQER;IYSEENVAK;GEPVYNAFK(Deamidated(N)@6);IYEKEEEHYDFTKPLVE;MLDMYWQPNR;TEEIPPPDLYKDTPAWY;MQDNPSDIENMYNR;FLQMQDNPSDIENMYNR;TEEIPPPDLYKDTPAWYQ;IDIYSEENVAK;VYKDNVGLS…	40	63904.5	5.87	-0.584
9	52.85	52.85	49.14	40	34.1	tr|Q1PYI0|Q1PYI0_KUEST	Uncharacterized protein OS=Kuenenia stuttgartiensis OX=174633 GN=KSMBR1_1164 PE=4 SV=1	KUEST	28	1.1.1.11027.1;1.1.1.5344.1;1.1.1.11208.1;1.1.1.11023.1;1.1.1.7040.1;1.1.1.12134.1;1.1.1.8873.1;1.1.1.1556.1;1.1.1.11099.1;1.1.1.8457.1;1.1.1.2457.1;1.1.1.11186.1;1.1.1.3558.1;1.1.1.11160.1;1.1.1.11995.1;1.1.1.3596.1;1.1.1.8377.1;1.1.1.6519.1;1.1.1.8472.1;1.1.1.4101.1;1.1.1.8355.1;1.1.1.3586.1;1.1.1.8657.1;1.1.1.11232.1;1.1.1.7314.1;1.1.1.3401.1;1.1.1.11874.1;1.1.1.8174.1;1.1.1.908.1;1.1.1.3381.1;…	36	LGYVVIPDPEDALTQQ;IMDYDKEQAER;VPKPVSEYGSSTD;NVAAMDDDSTITDGNVTNSPELVR;NITGSITGHHQK;SAYRGPEAIYPVPF;DDSTITDGNVTNSPELVR;DFPVDFSHF;GENVAAMDDDSTITDGNVTNSPELVR;MVGNTIGK;YVPDIVLAGGLVSEDHIYK;IVLAGGLVSEDHIYK;YIMDYDKEQAER;LGYVVIPDPEDALTQ;MDDDSTITDGNVTNSPELVR;LAGGLVSEDHIYK;LADRGEYVPDIVLAGGLVSEDHIYK;VPKPVSEYGSSTDQIF;DDDSTITDGNVTNSPELVR;KLGYVVIPDPEDALTQQ;AGGLVSEDHIYK;ICAIPDAMSR(Methylthio(C)@2);IDVLTIDGSGGGTGMS…	LGYVVIPDPEDALTQQ;IMDYDKEQAER;VPKPVSEYGSSTD;NVAAMDDDSTITDGNVTNSPELVR;NITGSITGHHQK;SAYRGPEAIYPVPF;DDSTITDGNVTNSPELVR;GENVAAMDDDSTITDGNVTNSPELVR;DFPVDFSHF;MVGNTIGK;IVLAGGLVSEDHIYK;YVPDIVLAGGLVSEDHIYK;YIMDYDKEQAER;LGYVVIPDPEDALTQ;MDDDSTITDGNVTNSPELVR;LAGGLVSEDHIYK;LADRGEYVPDIVLAGGLVSEDHIYK;VPKPVSEYGSSTDQIF;DDDSTITDGNVTNSPELVR;KLGYVVIPDPEDALTQQ;AGGLVSEDHIYK;ICAIPDAMSR(Methylthio(C)@2);IDVLTIDGSGGGTGMS…	28	57414.4	7.03	-0.202
10	44.3	44.3	59.91	47.76	43.5	tr|Q1Q516|Q1Q516_KUEST	Uncharacterized protein OS=Kuenenia stuttgartiensis OX=174633 GN=KSMBR1_0267 PE=4 SV=1	KUEST	27	1.1.1.9650.1;1.1.1.9537.1;1.1.1.11007.1;1.1.1.4743.1;1.1.1.6246.1;1.1.1.4707.1;1.1.1.10476.1;1.1.1.13334.1;1.1.1.5519.1;1.1.1.3425.1;1.1.1.6044.1;1.1.1.6811.1;1.1.1.8869.1;1.1.1.11740.1;1.1.1.4880.1;1.1.1.5626.1;1.1.1.8275.1;1.1.1.2755.1;1.1.1.10903.1;1.1.1.2632.1;1.1.1.9644.1;1.1.1.2544.1;1.1.1.8364.1;1.1.1.3934.1;1.1.1.4606.1;1.1.1.13201.1;1.1.1.2243.1;1.1.1.2752.1;1.1.1.5745.1;1.1.1.9968.1;1.1…	45	TNLNVEEKNDLVAF(Deamidated(N)@9);SVIEEPIDK;NVFPYLPLPHPNHATGGM;RFDLDFDIPEYFLPEFPPA;LLVTQFPQQQFNATADR(Deamidated(N)@12);SLLDFPPAPK;SVIEEPIDKAIEHDK;ESSYSSVIEEPIDK;GSQVHFMAEFQ;GIKDSPPYLHDGR;VINGQYIR(Deamidated(N)@3);LDIFGRL;VLETNLNVEEKNDLVAF(Deamidated(N)@12);YTDNLMHDLQVER;VTNDVTMSR(Deamidated(N)@3);LSTMTPEDIKEK;NYYELFNGLLNPK(Deamidated(N)@7);VLETNLNVEEK;LDFPPAPK;FNGLLNPK(Deamidated(N)@2);VVTLENYYELFN…	SVIEEPIDK;TNLNVEEKNDLVAF(Deamidated(N)@9);NVFPYLPLPHPNHATGGM;RFDLDFDIPEYFLPEFPPA;LLVTQFPQQQFNATADR(Deamidated(N)@12);SLLDFPPAPK;SVIEEPIDKAIEHDK;ESSYSSVIEEPIDK;GSQVHFMAEFQ;GIKDSPPYLHDGR;VINGQYIR(Deamidated(N)@3);LDIFGRL;VLETNLNVEEKNDLVAF(Deamidated(N)@12);YTDNLMHDLQVER;VTNDVTMSR(Deamidated(N)@3);LSTMTPEDIKEK;NYYELFNGLLNPK(Deamidated(N)@7);VLETNLNVEEK;LDFPPAPK;FNGLLNPK(Deamidated(N)@2);VVTLENYYELFN…	27	53581.4	7.24	-0.456
11	37.76	37.76	58.78	43.66	43.41	tr|Q1PZD5|Q1PZD5_KUEST	Nitrite oxidoreductase subunit B OS=Kuenenia stuttgartiensis OX=174633 GN=narH PE=4 SV=1	KUEST	26	1.1.1.4623.1;1.1.1.3103.1;1.1.1.8220.1;1.1.1.7458.1;1.1.1.878.1;1.1.1.8162.1;1.1.1.10485.1;1.1.1.8900.1;1.1.1.1625.1;1.1.1.12870.1;1.1.1.5751.1;1.1.1.3207.1;1.1.1.9088.1;1.1.1.11199.1;1.1.1.10566.1;1.1.1.4881.1;1.1.1.3311.1;1.1.1.4062.1;1.1.1.2215.1;1.1.1.6442.1;1.1.1.8813.1;1.1.1.9395.1;1.1.1.7637.1;1.1.1.9556.1;1.1.1.4769.1;1.1.1.5784.1;1.1.1.10461.1;1.1.1.8993.1;1.1.1.5673.1;1.1.1.2291.1;1.1.1…	36	VGYIPEDKEWR;MYNDTVIGFGEDGKEVVR(Deamidated(N)@3);LQGFLDDNPKNPITWL;DSLTDGRPME;SPNFGEDTAK;YKIEEGPK;TDDKDKETSQYGTGAPYGTYEGD;NDTVIGFGEDGK;MYNDTVIGFGEDGKEVVR;YPQFGTEPNIYYIPPR;TTVEEPIHIRPDK;QWAVGYIPEDKEWR;QWAVGYIPEDKEWR(Gln->pyro-Glu@N-term);NDTVIGFGEDGKEVVR(Deamidated(N)@1);TTVEEPIHIRPD;TDDKDKETSQYGTGAPYGTYEGDTIFEVAK;NINQWAVGYIPEDKEWR;NINQWAVGYIPEDKEWR(Deamidated(N)@3);NDTVIGFGEDGKEVVR;SSNQPGEYSTLPEHSR…	VGYIPEDKEWR;MYNDTVIGFGEDGKEVVR(Deamidated(N)@3);LQGFLDDNPKNPITWL;SPNFGEDTAK;DSLTDGRPME;YKIEEGPK;TDDKDKETSQYGTGAPYGTYEGD;NDTVIGFGEDGK;MYNDTVIGFGEDGKEVVR;TTVEEPIHIRPDK;YPQFGTEPNIYYIPPR;QWAVGYIPEDKEWR;QWAVGYIPEDKEWR(Gln->pyro-Glu@N-term);NDTVIGFGEDGKEVVR(Deamidated(N)@1);TTVEEPIHIRPD;TDDKDKETSQYGTGAPYGTYEGDTIFEVAK;NINQWAVGYIPEDKEWR;NINQWAVGYIPEDKEWR(Deamidated(N)@3);NDTVIGFGEDGKEVVR;SSNQPGEYSTLPEHSR…	26	47947.9	8.66	-0.653
12	34.18	34.18	48.21	38.93	36.96	tr|Q1PY43|Q1PY43_KUEST	60 kDa chaperonin OS=Kuenenia stuttgartiensis OX=174633 GN=groL PE=3 SV=1	KUEST	19	1.1.1.3268.1;1.1.1.6744.1;1.1.1.9866.1;1.1.1.8280.1;1.1.1.8573.1;1.1.1.2669.1;1.1.1.3603.1;1.1.1.6981.1;1.1.1.264.1;1.1.1.3706.1;1.1.1.4557.1;1.1.1.10974.1;1.1.1.5962.1;1.1.1.2949.1;1.1.1.11837.1;1.1.1.2247.1;1.1.1.6820.1;1.1.1.6848.1;1.1.1.3704.1;1.1.1.12632.1;1.1.1.10732.1;1.1.1.2358.1;1.1.1.10482.1	23	DGVTVADETELIDPYENTGAR;KVTIDSDNTTIVQGAGSSD;NMIEAGVIDPTK;FVTNQDTMEVELKDPY;VFEDKVSTIK;VGKDGVITVEEGK;AMLDDIATLTGGK;ILVGAATESEMKEK;DGVITVEEGK;LKLDGDEAMGVDIVK;LTTECIITDIPK(Methylthio(C)@5);FVTNQDTMEVELKDPYIL;LKLDGDEAMGVDIVKK;VGKDGVITVEEGK(Methyl(E)@11);GAGSSDAISGR;KVQNQNDIANIGSIAANNDKEVGK(Deamidated(N)@10);DSMYGYDADKGDYC(Methylthio(C)@14);DGVITVEEGK(Methyl(K)@10);AAVEEGILPGGGVALL	DGVTVADETELIDPYENTGAR;ILVGAATESEMKEK;KVTIDSDNTTIVQGAGSSD;NMIEAGVIDPTK;FVTNQDTMEVELKDPY;LKLDGDEAMGVDIVK;LTTECIITDIPK(Methylthio(C)@5);FVTNQDTMEVELKDPYIL;VFEDKVSTIK;LKLDGDEAMGVDIVKK;KVQNQNDIANIGSIAANNDKEVGK(Deamidated(N)@10);GAGSSDAISGR;AMLDDIATLTGGK;DSMYGYDADKGDYC(Methylthio(C)@14);AAVEEGILPGGGVALL	15	59067.9	5.23	-0.136
13	29.5	29.5	75.56	69.63	50.37	tr|Q1Q7P4|Q1Q7P4_KUEST	Small soluble cyt c OS=Kuenenia stuttgartiensis OX=174633 GN=KSMBR1_3082 PE=4 SV=1	KUEST	30	1.1.1.2583.1;1.1.1.2708.1;1.1.1.955.1;1.1.1.2265.1;1.1.1.1539.1;1.1.1.5256.1;1.1.1.1345.1;1.1.1.1423.1;1.1.1.1161.1;1.1.1.1052.1;1.1.1.2570.1;1.1.1.2280.1;1.1.1.857.1;1.1.1.682.1;1.1.1.3322.1;1.1.1.7844.1;1.1.1.2203.1;1.1.1.2028.1;1.1.1.859.1;1.1.1.1922.1;1.1.1.9723.1;1.1.1.11289.1;1.1.1.937.1;1.1.1.7990.1;1.1.1.10295.1;1.1.1.346.1;1.1.1.2122.1;1.1.1.835.1;1.1.1.419.1;1.1.1.1907.1;1.1.1.678.1;1.1…	35	ESHDSISVDKNYK(Cation:Na(D)@9);KVLNDEVAYH(Deamidated(N)@4);DAAAILAGVK;ESHDSISVDK;SISVDKNYK(Deamidated(N)@7);NMWDPFQSMR(Dioxidation(W)@3);AGVKESHDSISVDK;AGVKESHDSISVDK(Carbamyl(K)@4);AVTGLMELTSGQ;ATQQEICK(Methylthio(C)@7);KVLNDEVAYH;DAAAILAGVKESHDSISVDK;AGVKESHDSISVDKNYK(Carbamyl(K)@4);ESHDSISVDKNYK(Glu->pyro-Glu@N-term; Oxidation(H)@3; Methyl(D)@4);DAAAILAGVKE;ESHDSISVDKN;SKDAAAILAGVK;ESHDSISVDKNY…	KVLNDEVAYH(Deamidated(N)@4);DAAAILAGVK;ESHDSISVDKNYK(Cation:Na(D)@9);ESHDSISVDK;SISVDKNYK(Deamidated(N)@7);AGVKESHDSISVDK;NMWDPFQSMR(Dioxidation(W)@3);AGVKESHDSISVDK(Carbamyl(K)@4);AVTGLMELTSGQ;ATQQEICK(Methylthio(C)@7);KVLNDEVAYH;DAAAILAGVKESHDSISVDK;AGVKESHDSISVDKNYK(Carbamyl(K)@4);DAAAILAGVKE;ESHDSISVDKNYK(Glu->pyro-Glu@N-term; Oxidation(H)@3; Methyl(D)@4);SKDAAAILAGVK;ESHDSISVDKN;ESHDSISVDKNY…	30	14811.2	8.27	-0.127
14	27.68	27.68	31.14	22.77	18.3	tr|Q1PYY4|Q1PYY4_KUEST	Similar to molybdopterin oxidoreductase, molybdopterin-containing subunit/ NuoG subunit of NADH dehydrogenase I OS=Kuenenia stuttgartiensis OX=174633 GN=nuoG PE=4 SV=1	KUEST	14	1.1.1.6039.1;1.1.1.10640.1;1.1.1.1393.1;1.1.1.2692.1;1.1.1.7783.1;1.1.1.7235.1;1.1.1.9249.1;1.1.1.11179.1;1.1.1.7755.1;1.1.1.6925.1;1.1.1.6829.1;1.1.1.6815.1;1.1.1.9456.1;1.1.1.9436.1;1.1.1.2909.1;1.1.1.4964.1;1.1.1.5147.1;1.1.1.8108.1	18	QNPVPAPDESNPAIYR(Gln->pyro-Glu@N-term);EFMEIHPADAAK;QYNNGSMSLR(Deamidated(N)@4);IVSGSNTTEAHPVAALK;ALITGNVGRPNTGINPL;YTPEETEAITGVPK;HYPETPTNVLTGPGEDML;VVMGTNNMDNCAR(Methylthio(C)@11);AINSEEFMEIHPADAAK;HYPETPTNVLTGPGEDMLALTPEYK;YTPEETEAITGVPKEDIIK;KLPEKPGLKEPQ;GYPMSYNHPSEIMDEIAK;SYNHPSEIMDEIAK	QNPVPAPDESNPAIYR(Gln->pyro-Glu@N-term);EFMEIHPADAAK;QYNNGSMSLR(Deamidated(N)@4);IVSGSNTTEAHPVAALK;ALITGNVGRPNTGINPL;YTPEETEAITGVPK;HYPETPTNVLTGPGEDML;VVMGTNNMDNCAR(Methylthio(C)@11);AINSEEFMEIHPADAAK;HYPETPTNVLTGPGEDMLALTPEYK;KLPEKPGLKEPQ;YTPEETEAITGVPKEDIIK;GYPMSYNHPSEIMDEIAK;SYNHPSEIMDEIAK	14	99261.1	8.2	-0.312
15	22.58	22.58	52.27	41.19	30.97	tr|Q1Q2Z1|Q1Q2Z1_KUEST	Strongly similar to alcohol dehydrogenase OS=Kuenenia stuttgartiensis OX=174633 GN=adh PE=3 SV=1	KUEST	13	1.1.1.12321.1;1.1.1.5351.1;1.1.1.10634.1;1.1.1.7855.1;1.1.1.12313.1;1.1.1.9508.1;1.1.1.10157.1;1.1.1.5604.1;1.1.1.4473.1;1.1.1.5720.1;1.1.1.8750.1;1.1.1.11751.1;1.1.1.11316.1;1.1.1.7965.1;1.1.1.11264.1;1.1.1.9506.1;1.1.1.5762.1;1.1.1.5379.1	18	HVNDGDMNLAVLPDGITL;FSNIKDGVFSEYF;LGIGSVGWIEK;FGGDEFIPIPR;GGDEFIPIPR;NLVLGHESVGEVVEVGSEVK;AMLGIGSVGWIEK;TDMVTTGFH;EKPVAGPYDAIVKPI;SVGEVVEVGSEVK;YFGGDEFIPIPR;GHESVGEVVEVGSEVK;AGGAIGNINYFGGDEFIPIPR	HVNDGDMNLAVLPDGITL;FSNIKDGVFSEYF;LGIGSVGWIEK;FGGDEFIPIPR;GGDEFIPIPR;NLVLGHESVGEVVEVGSEVK;TDMVTTGFH;AMLGIGSVGWIEK;EKPVAGPYDAIVKPI;SVGEVVEVGSEVK;YFGGDEFIPIPR;GHESVGEVVEVGSEVK;AGGAIGNINYFGGDEFIPIPR	13	37539.4	5.27	0.17
16	22.41	22.41	38.1	28.62	20.74	tr|A0A2C9CBQ3|A0A2C9CBQ3_KUEST	Chaperone protein DnaK OS=Kuenenia stuttgartiensis OX=174633 GN=hsp70 PE=2 SV=1	KUEST	12	1.1.1.12907.1;1.1.1.9942.1;1.1.1.12014.1;1.1.1.3992.1;1.1.1.1801.1;1.1.1.1445.1;1.1.1.11996.1;1.1.1.2764.1;1.1.1.4090.1;1.1.1.2680.1;1.1.1.3405.1;1.1.1.2837.1;1.1.1.6258.1;1.1.1.1540.1;1.1.1.2654.1;1.1.1.11159.1	16	MDELTNILQEISTK;KMDELTNILQEISTK;TTAEDNQSSVEIH(Deamidated(N)@6);NHIVDYLAEEFKK;IIPSAEGATIGGK;CGASIEQALK(Methylthio(C)@1);DAQNYADQDKLVK;SLAYGLDKTEESQK;TTAEDNQSSVEIH;VSFDLDANGIINVH(Deamidated(N)@8);EAIKLEDEKDIQK;KMGTDYKVEIR	KMDELTNILQEISTK;MDELTNILQEISTK;TTAEDNQSSVEIH(Deamidated(N)@6);NHIVDYLAEEFKK;IIPSAEGATIGGK;CGASIEQALK(Methylthio(C)@1);DAQNYADQDKLVK;SLAYGLDKTEESQK;TTAEDNQSSVEIH;VSFDLDANGIINVH(Deamidated(N)@8);EAIKLEDEKDIQK;KMGTDYKVEIR	12	67467.6	5.3	-0.391
17	20.34	20.34	35.71	35.71	35.71	tr|Q1Q2G7|Q1Q2G7_KUEST	Uncharacterized protein OS=Kuenenia stuttgartiensis OX=174633 GN=kuste3440 PE=4 SV=1	KUEST	13	1.1.1.10044.1;1.1.1.1209.1;1.1.1.13194.1;1.1.1.10048.1;1.1.1.484.1;1.1.1.10027.1;1.1.1.649.1;1.1.1.5381.1;1.1.1.7682.1;1.1.1.13270.1;1.1.1.13011.1;1.1.1.5504.1;1.1.1.9254.1;1.1.1.6380.1;1.1.1.405.1;1.1.1.339.1;1.1.1.13010.1	17	VPLGDLGVDLSHLDELVQIVR;QFGVPDFSDPDYQR(Didehydro(Y)@12);QFGVPDFSDPDYQR(Oxidation(Y)@12);SRTDEDMKESMTK;GVPDFSDPDYQR;SRTDEDMKESMTKGTK(Carbamyl(K)@8);QFGVPDFSDPDYQR(Lys-add@N-term);TDEDMKESMTK;LSHLDELVQIVR;VPDFSDPDYQR;GVPDFSDPDYQR(Oxidation(Y)@10);GDLGVDLSHLDELVQIVR;NPNYVPLGDLGVDLSHLDELVQIVR(Carbamyl@N-term; Methyl(N)@3)	VPLGDLGVDLSHLDELVQIVR;QFGVPDFSDPDYQR(Didehydro(Y)@12);QFGVPDFSDPDYQR(Oxidation(Y)@12);SRTDEDMKESMTK;GVPDFSDPDYQR;SRTDEDMKESMTKGTK(Carbamyl(K)@8);QFGVPDFSDPDYQR(Lys-add@N-term);TDEDMKESMTK;VPDFSDPDYQR;LSHLDELVQIVR;GVPDFSDPDYQR(Oxidation(Y)@10);GDLGVDLSHLDELVQIVR;NPNYVPLGDLGVDLSHLDELVQIVR(Carbamyl@N-term; Methyl(N)@3)	13	17240.7	6.11	-0.374
18	20.01	20.01	66.15	52.31	40.77	tr|Q1PVE1|Q1PVE1_KUEST	Conserved hypothetical cytochrome protein OS=Kuenenia stuttgartiensis OX=174633 GN=KSMBR1_2162 PE=4 SV=1	KUEST	11	1.1.1.9646.1;1.1.1.4843.1;1.1.1.4806.1;1.1.1.12741.1;1.1.1.11847.1;1.1.1.10768.1;1.1.1.5479.1;1.1.1.7530.1;1.1.1.4960.1;1.1.1.12046.1;1.1.1.5063.1;1.1.1.7643.1;1.1.1.6200.1;1.1.1.5065.1;1.1.1.6477.1	15	GDGPSASEQEDDFGFPIKPFD;EYREPEPSVDVGLPLRPTER;TTPSGSLPTDEDIYR;GVPNSTMIPWDILTEEQR(Deamidated(N)@4);GDGPSASEQEDDFGFPIKPF;IEIPKEVTEEGK;EYREPEPSVDVGLPL;FTTGLNGTPMPSFAK(Deamidated(N)@6);RTTPSGSLPTDEDIYR;SLPTDEDIYR;IEIPKEVTEEGKNVYK	GDGPSASEQEDDFGFPIKPFD;TTPSGSLPTDEDIYR;EYREPEPSVDVGLPLRPTER;GDGPSASEQEDDFGFPIKPF;GVPNSTMIPWDILTEEQR(Deamidated(N)@4);IEIPKEVTEEGK;EYREPEPSVDVGLPL;RTTPSGSLPTDEDIYR;FTTGLNGTPMPSFAK(Deamidated(N)@6);IEIPKEVTEEGKNVYK;SLPTDEDIYR	11	29015	5.79	-0.45
19	19.81	19.81	34.96	27.36	23.91	tr|Q1PYY3|Q1PYY3_KUEST	Similar to nuoF subunit of the NADH:ubiquinone oxidoreductase OS=Kuenenia stuttgartiensis OX=174633 GN=nuoF PE=4 SV=1	KUEST	10	1.1.1.10674.1;1.1.1.3809.1;1.1.1.8917.1;1.1.1.8407.1;1.1.1.5166.1;1.1.1.9488.1;1.1.1.1312.1;1.1.1.8820.1;1.1.1.4602.1;1.1.1.12379.1;1.1.1.8805.1;1.1.1.9340.1;1.1.1.3936.1;1.1.1.8931.1	14	DRVEVVDTGCQ(Methylthio(C)@10);YVICNGDEGDPGAFMDR(Methylthio(C)@4; Deamidated(N)@5);AGSVNNTGLVEVPMGTTLR(Deamidated(N)@6);DTPIDYESVK;IIMDETTSMVEIAR;QYLDTPIDYESVK;VTESDVHEIVSR;IANGEGEREDIGLLEELAEATR(Deamidated(N)@3);GGAGFPTGK;VLSGMSPDKVIEEVK	DRVEVVDTGCQ(Methylthio(C)@10);YVICNGDEGDPGAFMDR(Methylthio(C)@4; Deamidated(N)@5);AGSVNNTGLVEVPMGTTLR(Deamidated(N)@6);DTPIDYESVK;IIMDETTSMVEIAR;QYLDTPIDYESVK;VTESDVHEIVSR;IANGEGEREDIGLLEELAEATR(Deamidated(N)@3);GGAGFPTGK;VLSGMSPDKVIEEVK	10	59987	5.6	-0.15
20	19.72	19.72	25.78	25.78	20.4	tr|Q1PYX3|Q1PYX3_KUEST	Similar to large subunit corrinoid FeS protein of CODH/ACS complex (AscC) OS=Kuenenia stuttgartiensis OX=174633 GN=acsC PE=4 SV=1	KUEST	11	1.1.1.13291.1;1.1.1.4950.1;1.1.1.8300.1;1.1.1.10740.1;1.1.1.6356.1;1.1.1.5132.1;1.1.1.10778.1;1.1.1.9121.1;1.1.1.9030.1;1.1.1.4897.1;1.1.1.6210.1;1.1.1.5082.1;1.1.1.9200.1;1.1.1.6355.1;1.1.1.4834.1	15	IVLDVSGDNPR;DDLSNEAFDER;KVQVGEENVLFR;KANLSDCPDVSEEAK(Methylthio(C)@7);AGVEEIVLDVSGDNPR;KAGVEEIVLDVSGDNPR;YAGIVVVDHCEPWGIMPL(Methylthio(C)@10);EIVLDVSGDNPR;VQVGEENVLFR;TNLYTDPQKPIQVEPK;ICDDLSNEAFDER(Methylthio(C)@2)	IVLDVSGDNPR;DDLSNEAFDER;KVQVGEENVLFR;AGVEEIVLDVSGDNPR;KANLSDCPDVSEEAK(Methylthio(C)@7);KAGVEEIVLDVSGDNPR;YAGIVVVDHCEPWGIMPL(Methylthio(C)@10);EIVLDVSGDNPR;ICDDLSNEAFDER(Methylthio(C)@2);TNLYTDPQKPIQVEPK;VQVGEENVLFR	11	48260.8	7.06	-0.094
21	19.3	19.3	48.67	48.67	42.48	tr|A0A2C9CIZ4|A0A2C9CIZ4_KUEST	Uncharacterized protein OS=Kuenenia stuttgartiensis OX=174633 GN=KSMBR1_2242 PE=4 SV=1	KUEST	19	1.1.1.10212.1;1.1.1.12992.1;1.1.1.5869.1;1.1.1.10155.1;1.1.1.9852.1;1.1.1.7213.1;1.1.1.7508.1;1.1.1.7254.1;1.1.1.8717.1;1.1.1.10277.1;1.1.1.935.1;1.1.1.7464.1;1.1.1.8729.1;1.1.1.7393.1;1.1.1.4915.1;1.1.1.7097.1;1.1.1.9658.1;1.1.1.5978.1;1.1.1.11442.1;1.1.1.3270.1;1.1.1.3377.1;1.1.1.10575.1;1.1.1.9277.1;1.1.1.8624.1;1.1.1.10244.1	25	IIEQINEGTPEMMMPFK(Deamidated(N)@6);QINEGTPEMMMPFK(Oxidation(M)@11);GNPTDLGVGLGAR;KFADAEWQ;EGTPEMMMPFK;QINEGTPEMMMPFKEK(Oxidation(M)@9);IIEQINEGTPEMMMPFK(Oxidation(M)@13; Oxidation(M)@14);VDGNPTDLGVGLGAR;IIEQINEGTPEMMMPF;IIEQINEGTPEMMMPFK(Oxidation(M)@14);KFADAEWQAK(Dioxidation(W)@7);IIEQINEGTPEMMMPFKEK;QINEGTPEMMMPFKEK;IIEQINEGTPEMMMPFKEK(Oxidation(M)@12);GVDGNPTDLGVGLGAR;KFADAEWQAK;IIEQINEGTPEMM…	VDGNPTDLGVGLGAR;GVDGNPTDLGVGLGAR;TCHGVDGNPTDLGVGLGAR(Methylthio(C)@2);GNPTDLGVGLGAR	4	12253	7.67	-0.234
22	18.43	18.43	47.03	35.59	34.32	tr|Q1PYI1|Q1PYI1_KUEST	Similar to PQQ biosynthesis protein C OS=Kuenenia stuttgartiensis OX=174633 GN=pqqC PE=4 SV=1	KUEST	11	1.1.1.6432.1;1.1.1.7326.1;1.1.1.8061.1;1.1.1.5425.1;1.1.1.10391.1;1.1.1.5506.1;1.1.1.10900.1;1.1.1.5544.1;1.1.1.6440.1;1.1.1.12391.1;1.1.1.6541.1;1.1.1.11234.1;1.1.1.11238.1	13	KGALDFL;RAGLNDDAVLFF(Deamidated(R)@1);AIAICPDEAGR(Methylthio(C)@5);AMSTDEFFDKLE;KGMDAELTHPAIFR;GMDAELTHPAIFR;NNIVMLPETK(Oxidation(M)@5);IELDVEHAANIR;HIELDVEHAANIR;AMSTDEFFDKL;AMSTDEFFDKLEAE	KGALDFL;RAGLNDDAVLFF(Deamidated(R)@1);AIAICPDEAGR(Methylthio(C)@5);AMSTDEFFDKLE;KGMDAELTHPAIFR;NNIVMLPETK(Oxidation(M)@5);GMDAELTHPAIFR;IELDVEHAANIR;HIELDVEHAANIR;AMSTDEFFDKLEAE;AMSTDEFFDKL	11	26955.9	6.01	-0.328
23	17.86	23.29	37.82	25.55	18.4	tr|Q1PXW0|Q1PXW0_KUEST	60 kDa chaperonin OS=Kuenenia stuttgartiensis OX=174633 GN=groL PE=3 SV=1	KUEST	15	1.1.1.2426.1;1.1.1.3268.1;1.1.1.6153.1;1.1.1.3505.1;1.1.1.2669.1;1.1.1.6853.1;1.1.1.3603.1;1.1.1.6145.1;1.1.1.2779.1;1.1.1.9429.1;1.1.1.2247.1;1.1.1.3704.1;1.1.1.9290.1;1.1.1.7528.1;1.1.1.2358.1;1.1.1.2396.1;1.1.1.8478.1	17	VASNYDAEIGK;EISTTTSDYDREK(Dehydrated(T)@6);TVASNYDAEIGK;MAGGVVMINVGAATESEMKEK;KIEIDKENTIIIEGAGESK;DGVITVEEGK;VGKDGVITVEEGK;KIEIDKENTIIIE;INVGAATESEMKEK;EVEQIATVASNYDAEIGK;VGKDGVITVEEGK(Methyl(E)@11);NDLALTGDEK;EIDLPDHMQNIGAQ;KIEIDKENTIIIEGAGESK(Deamidated(N)@8);DGVITVEEGK(Methyl(K)@10)	VASNYDAEIGK;EISTTTSDYDREK(Dehydrated(T)@6);TVASNYDAEIGK;MAGGVVMINVGAATESEMKEK;KIEIDKENTIIIEGAGESK;KIEIDKENTIIIE;EVEQIATVASNYDAEIGK;INVGAATESEMKEK;NDLALTGDEK;EIDLPDHMQNIGAQ;KIEIDKENTIIIEGAGESK(Deamidated(N)@8)	11	62851.9	7.56	-0.09
24	17.7	17.7	40.33	40.33	35.36	tr|Q1Q0T5|Q1Q0T5_KUEST	Uncharacterized protein OS=Kuenenia stuttgartiensis OX=174633 GN=KSMBR1_3600 PE=4 SV=1	KUEST	12	1.1.1.855.1;1.1.1.4534.1;1.1.1.10771.1;1.1.1.3716.1;1.1.1.13253.1;1.1.1.6666.1;1.1.1.7577.1;1.1.1.3303.1;1.1.1.7613.1;1.1.1.1835.1;1.1.1.5446.1;1.1.1.1717.1;1.1.1.6609.1	13	CGTEYEEPGKNF(Methylthio(C)@1);ICEICMDDITSTK(Methylthio(C)@2; Methylthio(C)@5; Oxidation(M)@6);CGTEYEEPGKNFK(Methylthio(C)@1);EICMDDITSTK(Methylthio(C)@3);HTSLPSAW;EFDECSEIGYIWDFK(Methylthio(C)@5);LEIVCEK(Methylthio(C)@5);MDDITSTK;CGTEYEEPGK(Methylthio(C)@1);CGTEYEEPGKN(Methylthio(C)@1);ICMDDITSTK(Methylthio(C)@2; Oxidation(M)@3);LWDKPCGK(Methylthio(C)@6)	CGTEYEEPGKNFK(Methylthio(C)@1);CGTEYEEPGKNF(Methylthio(C)@1);ICEICMDDITSTK(Methylthio(C)@2; Methylthio(C)@5; Oxidation(M)@6);EICMDDITSTK(Methylthio(C)@3);HTSLPSAW;EFDECSEIGYIWDFK(Methylthio(C)@5);LEIVCEK(Methylthio(C)@5);CGTEYEEPGK(Methylthio(C)@1);MDDITSTK;CGTEYEEPGKN(Methylthio(C)@1);LWDKPCGK(Methylthio(C)@6);ICMDDITSTK(Methylthio(C)@2; Oxidation(M)@3)	12	20249.4	6.31	-0.264
25	17.38	17.38	46.23	37.74	29.87	tr|Q1PYX6|Q1PYX6_KUEST	Similar to small subunit of corrinoid FeS protein of the CODH/ACS complex (AcsD) OS=Kuenenia stuttgartiensis OX=174633 GN=acsD PE=4 SV=1	KUEST	9	1.1.1.2516.1;1.1.1.11157.1;1.1.1.2626.1;1.1.1.2624.1;1.1.1.3989.1;1.1.1.4367.1;1.1.1.11286.1;1.1.1.9944.1;1.1.1.5996.1;1.1.1.2515.1;1.1.1.5260.1;1.1.1.1015.1;1.1.1.6115.1	13	SDDKDAPQWGPR;VSEMDFPLKR;GHKPVIAMDVYDISPDDWPETLK;DVYDISPDDWPETLK;SSVNEITIGATK;SLLQSGVDIIR;SSVNEITIGATKEEGGTR;SAAETVDVAK;LIGVVTQDNYK	SLLQSGVDIIR;SDDKDAPQWGPR;VSEMDFPLKR;GHKPVIAMDVYDISPDDWPETLK;SSVNEITIGATKEEGGTR;DVYDISPDDWPETLK;SAAETVDVAK;SSVNEITIGATK;LIGVVTQDNYK	9	34945.2	5.14	-0.209
26	16.92	18.31	34.88	25.97	18.55	tr|Q1PY41|Q1PY41_KUEST	60 kDa chaperonin OS=Kuenenia stuttgartiensis OX=174633 GN=groEL PE=3 SV=1	KUEST	11	1.1.1.1354.1;1.1.1.10543.1;1.1.1.10570.1;1.1.1.12894.1;1.1.1.3727.1;1.1.1.2423.1;1.1.1.2787.1;1.1.1.8076.1;1.1.1.2536.1;1.1.1.7693.1;1.1.1.1349.1;1.1.1.3843.1;1.1.1.9951.1	13	VGAATEVEMNEK(Deamidated(N)@10);QIANNTGADGSVVFEEVK(Deamidated(N)@4);AAVEEGIVPGGGIAYIR;VGAATEVEMNEK;TTLEIVEGMQFDK;AITEDLGLKL;VGAATEVEMNEKK;QIANNTGADGSVVFEEVK;DNTTIIEGAATK;LAGGVAVIH;AITEDLGLKLENIGIEDL	VGAATEVEMNEK(Deamidated(N)@10);QIANNTGADGSVVFEEVK(Deamidated(N)@4);AAVEEGIVPGGGIAYIR;VGAATEVEMNEK;AITEDLGLKL;TTLEIVEGMQFDK;VGAATEVEMNEKK;QIANNTGADGSVVFEEVK;DNTTIIEGAATK;LAGGVAVIH;AITEDLGLKLENIGIEDL	11	57448	5.13	-0.048
27	15.23	17.68	33.52	19.18	17.13	tr|Q1PZK4|Q1PZK4_KUEST	60 kDa chaperonin OS=Kuenenia stuttgartiensis OX=174633 GN=groEL PE=3 SV=1	KUEST	14	1.1.1.3268.1;1.1.1.2694.1;1.1.1.8422.1;1.1.1.4727.1;1.1.1.8059.1;1.1.1.2048.1;1.1.1.2799.1;1.1.1.2669.1;1.1.1.2862.1;1.1.1.3603.1;1.1.1.2958.1;1.1.1.2895.1;1.1.1.1949.1;1.1.1.8292.1;1.1.1.2916.1;1.1.1.13344.1;1.1.1.2807.1;1.1.1.9104.1;1.1.1.1927.1;1.1.1.2247.1;1.1.1.2700.1;1.1.1.2358.1	22	SFGSPVVINDGVTVAK(Deamidated(N)@9);EVELEDPYEDMGAK;SFGSPVVINDGVTVAK;KVVIDKENTTITEGGGDTK(Deamidated(N)@8);DGVITVEEGK;KVVIDKENTTITE;VGKDGVITVEEGK;VGKDGVITVEEGK(Methyl(E)@11);FVTSPDTMEVVFENPYIL;KVVIDKENTTITEGGGDTK;INVGAATEAEMK;KVVIDKENTTITEGGGD;DGVITVEEGK(Methyl(K)@10);VVIDKENTTITEGGGDTK	EVELEDPYEDMGAK;SFGSPVVINDGVTVAK(Deamidated(N)@9);SFGSPVVINDGVTVAK;KVVIDKENTTITEGGGDTK(Deamidated(N)@8);KVVIDKENTTITE;INVGAATEAEMK;KVVIDKENTTITEGGGDTK;FVTSPDTMEVVFENPYIL;KVVIDKENTTITEGGGD;VVIDKENTTITEGGGDTK	10	56960.3	5.44	-0.104
28	15.1	15.1	42.55	37.58	26.09	tr|Q1PZD4|Q1PZD4_KUEST	Nitrite oxidoreductase subunit C OS=Kuenenia stuttgartiensis OX=174633 GN=nrxC PE=4 SV=1	KUEST	10	1.1.1.11215.1;1.1.1.5273.1;1.1.1.4466.1;1.1.1.3572.1;1.1.1.9684.1;1.1.1.9008.1;1.1.1.3295.1;1.1.1.3215.1;1.1.1.4361.1;1.1.1.5391.1;1.1.1.5285.1;1.1.1.7753.1;1.1.1.4590.1;1.1.1.1411.1	14	GGIEECPAR(Methylthio(C)@6);YMQIDVPAHIT;ADLLATGGIEECPAR(Methylthio(C)@12);YMQIDVPAHITVGALE;EEAEGVKGVAEEELTPAK;MHDDFSTNPH;YPNMHDDFSTNPH;NLLSLPR;DHQDVDGCSKFENK(Methylthio(C)@8);GVAEEELTPAKE	GGIEECPAR(Methylthio(C)@6);YMQIDVPAHIT;ADLLATGGIEECPAR(Methylthio(C)@12);YMQIDVPAHITVGALE;EEAEGVKGVAEEELTPAK;MHDDFSTNPH;YPNMHDDFSTNPH;NLLSLPR;DHQDVDGCSKFENK(Methylthio(C)@8);GVAEEELTPAKE	10	35566.1	5.16	-0.342
29	14.22	14.22	35.81	27.91	22.33	tr|Q1Q794|Q1Q794_KUEST	Probable transaldolase OS=Kuenenia stuttgartiensis OX=174633 GN=fsaA PE=3 SV=1	KUEST	7	1.1.1.5997.1;1.1.1.2869.1;1.1.1.9171.1;1.1.1.10429.1;1.1.1.10073.1;1.1.1.3365.1;1.1.1.10076.1;1.1.1.2968.1;1.1.1.2855.1;1.1.1.10997.1	10	DTQGLVDEAR;EAHDLGILDGVTTNPSL;DGVTTNPSLVAK;EAHDLGILDGVTTNPSLVAK;LDDIGHTGMDVIEDIR;SLDTQGLVDEAR;EAHDLGILDGVTTNPS	DTQGLVDEAR;DGVTTNPSLVAK;EAHDLGILDGVTTNPSL;EAHDLGILDGVTTNPSLVAK;LDDIGHTGMDVIEDIR;SLDTQGLVDEAR;EAHDLGILDGVTTNPS	7	23358.9	5.15	0.105
30	14.12	14.12	73.48	62.12	56.06	tr|Q1Q4G9|Q1Q4G9_KUEST	Uncharacterized protein OS=Kuenenia stuttgartiensis OX=174633 GN=KSMBR1_0446 PE=4 SV=1	KUEST	10	1.1.1.3419.1;1.1.1.11403.1;1.1.1.3436.1;1.1.1.10176.1;1.1.1.9784.1;1.1.1.11780.1;1.1.1.11072.1;1.1.1.3516.1;1.1.1.10179.1;1.1.1.3493.1;1.1.1.2924.1;1.1.1.9901.1;1.1.1.2926.1;1.1.1.10500.1	14	YSTPDAVDSGDFVSDFDGIK;VAEENKVITESMGK;NALLPFFNK;AAIDLLGQIDSQSGQK;VAEENKVITESMGK(Deamidated(N)@5);SAAQSFIDELGK;AAIDLLGQIDSQ;AVDSGDFVSDFDGIK;LAHVAEENKVITE;SGDFVSDFDGIK	YSTPDAVDSGDFVSDFDGIK;VAEENKVITESMGK;NALLPFFNK;AAIDLLGQIDSQSGQK;SAAQSFIDELGK;VAEENKVITESMGK(Deamidated(N)@5);AAIDLLGQIDSQ;AVDSGDFVSDFDGIK;SGDFVSDFDGIK;LAHVAEENKVITE	10	14302	4.64	-0.183
31	14	14	50.68	39.19	39.19	tr|A0A2C9CKA3|A0A2C9CKA3_KUEST	Strongly similar to small heat shock protein OS=Kuenenia stuttgartiensis OX=174633 GN=hsp_4 PE=3 SV=1	KUEST	7	1.1.1.9282.1;1.1.1.10104.1;1.1.1.10738.1;1.1.1.7475.1;1.1.1.10676.1;1.1.1.8425.1;1.1.1.10670.1;1.1.1.10335.1;1.1.1.8423.1	9	GQEAGAWSPSIDLSETDDNIVVK;EVNISIQDNNLIIKGEK;SVELPASVDMDKVNAECK(Methylthio(C)@17);EAGAWSPSIDLSETDDNIVVK;IDLSETDDNIVVK;AWSPSIDLSETDDNIVVK;EVNISIQDNNLIIK	GQEAGAWSPSIDLSETDDNIVVK;EVNISIQDNNLIIKGEK;SVELPASVDMDKVNAECK(Methylthio(C)@17);EAGAWSPSIDLSETDDNIVVK;IDLSETDDNIVVK;AWSPSIDLSETDDNIVVK;EVNISIQDNNLIIK	7	16936.2	5.21	-0.728
32	13.92	13.92	14.03	12.9	12.9	tr|Q1Q4M6|Q1Q4M6_KUEST	Similar to chromosomal condensation regulatory protein OS=Kuenenia stuttgartiensis OX=174633 GN=kuste4197 PE=4 SV=1	KUEST	7	1.1.1.8533.1;1.1.1.10894.1;1.1.1.1924.1;1.1.1.7315.1;1.1.1.675.1;1.1.1.6323.1;1.1.1.7439.1;1.1.1.7572.1	8	AVEGPGECETDDIEADPK(Methylthio(C)@8);SWGLNDEGQLGDGSTR;GNIYVWGLNGDGQLGDGTNR(Deamidated(N)@9);GLNDEGQIGNGEK(Deamidated(N)@10);SADNPVLNPVQVQ;NGDGQLGDGTNR(Deamidated(N)@1);VWGLNGDGQLGDGTNR(Deamidated(N)@5)	AVEGPGECETDDIEADPK(Methylthio(C)@8);SWGLNDEGQLGDGSTR;GNIYVWGLNGDGQLGDGTNR(Deamidated(N)@9);GLNDEGQIGNGEK(Deamidated(N)@10);SADNPVLNPVQVQ;NGDGQLGDGTNR(Deamidated(N)@1);VWGLNGDGQLGDGTNR(Deamidated(N)@5)	7	64377.6	5.35	-0.445
33	13.72	13.72	33.48	25.97	18.03	tr|Q1PUP9|Q1PUP9_KUEST	Adenosylhomocysteinase OS=Kuenenia stuttgartiensis OX=174633 GN=ahcY PE=3 SV=1	KUEST	8	1.1.1.10551.1;1.1.1.4818.1;1.1.1.8185.1;1.1.1.3725.1;1.1.1.5655.1;1.1.1.12544.1;1.1.1.1648.1;1.1.1.3977.1;1.1.1.1658.1;1.1.1.1560.1	10	GTDILLSGK;VADIGLADWGYR;IHGITEETTTGVHR;KLDEEVAAEMVK;VPAVNVNDAVTK;EIALAEAEMPALM;VPAVNVNDAVTK(Deamidated(N)@7);NIGHFDLEIDTK	VADIGLADWGYR;IHGITEETTTGVHR;GTDILLSGK;KLDEEVAAEMVK;VPAVNVNDAVTK;EIALAEAEMPALM;VPAVNVNDAVTK(Deamidated(N)@7);NIGHFDLEIDTK	8	52032.7	6.06	-0.359
34	12.79	12.79	20.49	10.53	10.53	tr|Q1PW50|Q1PW50_KUEST	Similar to NAD(P) oxidoreductase, FAD-containing subunit OS=Kuenenia stuttgartiensis OX=174633 GN=KSMBR1_2381 PE=4 SV=1	KUEST	7	1.1.1.2997.1;1.1.1.3049.1;1.1.1.6551.1;1.1.1.8792.1;1.1.1.3018.1;1.1.1.5375.1;1.1.1.2939.1;1.1.1.2184.1	8	TDFSFVK;LQGHEVTIYER;MELSEPDESGR;RVVVAGGGSTAMDAAR;YNTEVGKDIDFEK;VVVAGGGSTAMDAAR;SINQFLNGEEVVGEK(Deamidated(N)@7)	TDFSFVK;LQGHEVTIYER;RVVVAGGGSTAMDAAR;MELSEPDESGR;YNTEVGKDIDFEK;VVVAGGGSTAMDAAR;SINQFLNGEEVVGEK(Deamidated(N)@7)	7	76933.1	6.11	-0.358
35	12.25	12.25	43.59	24.36	23.72	tr|Q1Q315|Q1Q315_KUEST	Bacterioferritin OS=Kuenenia stuttgartiensis OX=174633 GN=bfr PE=3 SV=1	KUEST	6	1.1.1.10051.1;1.1.1.13051.1;1.1.1.12273.1;1.1.1.3827.1;1.1.1.13197.1;1.1.1.12274.1;1.1.1.12975.1	7	MLLEEILKSEEEHLSNLQTM;MLLEEILKSEEEHLSNLQTMVNNIEK(Deamidated(N)@22);MLLEEILKSEEEHLSN;SEEEHLSNLQTMVNNIEK;NRDIEVEAIAR;MLLEEILKSEEEHLSNLQ	MLLEEILKSEEEHLSNLQTM;MLLEEILKSEEEHLSN;MLLEEILKSEEEHLSNLQTMVNNIEK(Deamidated(N)@22);SEEEHLSNLQTMVNNIEK;MLLEEILKSEEEHLSNLQ;NRDIEVEAIAR	6	17967.9	5.17	-0.26
36	12	12	82.81	71.88	71.88	tr|Q1PVQ6|Q1PVQ6_KUEST	Uncharacterized protein OS=Kuenenia stuttgartiensis OX=174633 GN=KSMBR1_2243 PE=4 SV=1	KUEST	10	1.1.1.12565.1;1.1.1.7471.1;1.1.1.7032.1;1.1.1.7234.1;1.1.1.12382.1;1.1.1.7554.1;1.1.1.13126.1;1.1.1.4965.1;1.1.1.5283.1;1.1.1.12895.1;1.1.1.7583.1;1.1.1.7402.1;1.1.1.4850.1;1.1.1.7698.1;1.1.1.13013.1;1.1.1.13109.1;1.1.1.7281.1	17	DKEVNDFLQQNNITK;STTNTGGDTMGIIR;IFHVHNELVELDKEVNDFLQQNNITK;NELVELDKEVNDFLQQNNITK;NELVELDKEVNDFLQQNNITK(Deamidated(N)@17);IFHVHNELVELDKEVNDFLQQNNITK(Deamidated(N)@22);LDKEVNDFLQQNNITK(Deamidated(N)@12);VVSVSDSTTNTGGDTMGIIR;VVSVSDSTTNTGGDTMGIIR(Deamidated(N)@10);VVSVSDSTTNTGGDTMGIIR(Oxidation(M)@16)	DKEVNDFLQQNNITK;STTNTGGDTMGIIR;IFHVHNELVELDKEVNDFLQQNNITK;NELVELDKEVNDFLQQNNITK(Deamidated(N)@17);NELVELDKEVNDFLQQNNITK;IFHVHNELVELDKEVNDFLQQNNITK(Deamidated(N)@22);LDKEVNDFLQQNNITK(Deamidated(N)@12);VVSVSDSTTNTGGDTMGIIR;VVSVSDSTTNTGGDTMGIIR(Deamidated(N)@10);VVSVSDSTTNTGGDTMGIIR(Oxidation(M)@16)	10	7247.26	5.47	-0.1
37	11.97	11.97	54.69	54.69	46.88	tr|A0A2C9CF55|A0A2C9CF55_KUEST	Uncharacterized protein OS=Kuenenia stuttgartiensis OX=174633 GN=gloA_1 PE=4 SV=1	KUEST	6	1.1.1.2140.1;1.1.1.2175.1;1.1.1.10245.1;1.1.1.9701.1;1.1.1.10255.1;1.1.1.10704.1;1.1.1.9590.1;1.1.1.9379.1;1.1.1.10192.1	9	DPDGLIIELR;IRDPDGLIIELR;GIAIAQEPVDLGNSFR;GEIRDPDGLIIELR;RVDHVEIVPGNAEK;GDTVLEIISVDDPKPK	DPDGLIIELR;IRDPDGLIIELR;GIAIAQEPVDLGNSFR;GEIRDPDGLIIELR;RVDHVEIVPGNAEK;GDTVLEIISVDDPKPK	6	14667	4.94	-0.279
38	11.78	11.78	25.72	14.03	14.03	tr|Q1PZX1|Q1PZX1_KUEST	Putative outer membrane protein (OMP) OS=Kuenenia stuttgartiensis OX=174633 GN=KSMBR1_1628 PE=4 SV=1	KUEST	8	1.1.1.770.1;1.1.1.1142.1;1.1.1.10119.1;1.1.1.615.1;1.1.1.6041.1;1.1.1.612.1;1.1.1.3199.1;1.1.1.6391.1;1.1.1.5105.1;1.1.1.1171.1;1.1.1.11229.1	11	VTLPGFNPPTIPVGGAATGTRPK;GAEDWIEK;NNQDETAAVSAHTGAGK(Deamidated(N)@2);SFPGDVTLPGFNPPTIPVGGAATGTRPK;PPTIPVGGAATGTRPK;LWADADVNEHLR;NNQDETAAVSAHTGAGK;SSIDDDYVLNQTR(Deamidated(N)@10)	VTLPGFNPPTIPVGGAATGTRPK;NNQDETAAVSAHTGAGK(Deamidated(N)@2);PPTIPVGGAATGTRPK;GAEDWIEK;SFPGDVTLPGFNPPTIPVGGAATGTRPK;LWADADVNEHLR;NNQDETAAVSAHTGAGK;SSIDDDYVLNQTR(Deamidated(N)@10)	8	61147.6	4.57	-0.337
39	11.09	11.09	16.24	14.72	13.71	tr|Q1Q7J1|Q1Q7J1_KUEST	Similar to hydroxylamine oxidoreductase hao OS=Kuenenia stuttgartiensis OX=174633 GN=hao PE=4 SV=1	KUEST	7	1.1.1.5053.1;1.1.1.11556.1;1.1.1.7549.1;1.1.1.7435.1;1.1.1.11391.1;1.1.1.10223.1;1.1.1.7441.1;1.1.1.7308.1;1.1.1.5106.1;1.1.1.6140.1	10	WYDPDHYYTPN;YTPPKELLPGEGK;IGPDNSGDVYHL;IVVDLYNDGMLDPMPK(Deamidated(N)@7);FSTVNSHMGTSLVDR(Deamidated(N)@5);FAADQLEAMDEAIK;IVVDLYNDGMLDPMPK	WYDPDHYYTPN;IGPDNSGDVYHL;YTPPKELLPGEGK;FAADQLEAMDEAIK;IVVDLYNDGMLDPMPK(Deamidated(N)@7);FSTVNSHMGTSLVDR(Deamidated(N)@5);IVVDLYNDGMLDPMPK	7	67043	6.69	-0.686
40	10.66	10.66	38.55	29.86	19.42	tr|A0A2C9CLM3|A0A2C9CLM3_KUEST	YfdX protein OS=Kuenenia stuttgartiensis OX=174633 GN=KSMBR1_4084 PE=4 SV=1	KUEST	6	1.1.1.4841.1;1.1.1.5354.1;1.1.1.8242.1;1.1.1.8901.1;1.1.1.10620.1;1.1.1.9103.1;1.1.1.4717.1	7	LVDLSYIER;MEIVEPIIDAK;LVFHEVDNPLVEVQ;IVEPIIDAK;SLIDQNPEAAKPEIK;EVDKVQDDKIALYEGTIA	LVDLSYIER;MEIVEPIIDAK;LVFHEVDNPLVEVQ;IVEPIIDAK;SLIDQNPEAAKPEIK;EVDKVQDDKIALYEGTIA	6	38586.2	6.49	-0.387
41	10.49	10.49	54.29	35.71	27.14	tr|Q1Q419|Q1Q419_KUEST	Uncharacterized protein OS=Kuenenia stuttgartiensis OX=174633 GN=kuste3991 PE=3 SV=1	KUEST	5	1.1.1.3819.1;1.1.1.5984.1;1.1.1.10958.1;1.1.1.5874.1;1.1.1.4559.1;1.1.1.12348.1	6	GLLVISLPR;RLPVNVESDQVR;AEYIDGLLVISLPR;LPVNVESDQVR;DTGFFENTTTSR	GLLVISLPR;RLPVNVESDQVR;AEYIDGLLVISLPR;LPVNVESDQVR;DTGFFENTTTSR	5	15901.1	5.27	-0.383
42	10.47	10.47	53.49	33.72	24.42	tr|Q1Q2X6|Q1Q2X6_KUEST	Similar to acyl carrier protein OS=Kuenenia stuttgartiensis OX=174633 GN=acpP PE=4 SV=1	KUEST	6	1.1.1.12510.1;1.1.1.5536.1;1.1.1.11952.1;1.1.1.8521.1;1.1.1.8537.1;1.1.1.9619.1;1.1.1.6379.1;1.1.1.9520.1;1.1.1.9505.1	9	GVTSIVAEVTELDEKEIWEK;IVAEVTELDEKEIWEKR;IVAEVTELDEKEIWEK;VTELDEKEIWEK;GVTSIVAEVTELDEKEIWEKR;ELDEKEIWEK	GVTSIVAEVTELDEKEIWEK;IVAEVTELDEKEIWEK;IVAEVTELDEKEIWEKR;VTELDEKEIWEK;ELDEKEIWEK;GVTSIVAEVTELDEKEIWEKR	6	9650.05	4.34	-0.081
43	10.44	10.44	66.94	43.8	34.71	tr|Q1PVQ5|Q1PVQ5_KUEST	Similar to superoxide reductase OS=Kuenenia stuttgartiensis OX=174633 GN=KSMBR1_2244 PE=4 SV=1	KUEST	8	1.1.1.7307.1;1.1.1.6508.1;1.1.1.6302.1;1.1.1.10606.1;1.1.1.5180.1;1.1.1.10015.1;1.1.1.11363.1;1.1.1.6402.1;1.1.1.10043.1	9	VGEAPHVMENGHFIQF(Deamidated(N)@10);VGEAPHVMENGHFIQ(Deamidated(N)@10);VDFTAVMTKPDISFS;VGEAPHVMENGHF(Deamidated(N)@10);VDFTAVMTKPDISF(Oxidation(M)@7);KHVPVITLPEK(Lys->Hydroxyallysine(K)@1);VPVITLPEK;VDFTAVMTKPDISFS(Oxidation(M)@7)	VGEAPHVMENGHFIQF(Deamidated(N)@10);VGEAPHVMENGHF(Deamidated(N)@10);KHVPVITLPEK(Lys->Hydroxyallysine(K)@1);VGEAPHVMENGHFIQ(Deamidated(N)@10);VDFTAVMTKPDISFS;VDFTAVMTKPDISF(Oxidation(M)@7);VPVITLPEK;VDFTAVMTKPDISFS(Oxidation(M)@7)	8	13441.5	6.58	0.02
44	10.14	10.14	59.3	46.51	45.35	tr|Q1PV11|Q1PV11_KUEST	Uncharacterized protein OS=Kuenenia stuttgartiensis OX=174633 GN=KSMBR1_1765 PE=4 SV=1	KUEST	7	1.1.1.1809.1;1.1.1.1831.1;1.1.1.10633.1;1.1.1.3318.1;1.1.1.3433.1;1.1.1.10422.1;1.1.1.6990.1;1.1.1.6957.1;1.1.1.6188.1;1.1.1.1415.1;1.1.1.10304.1	11	FCHMEEASEDIEK(Methylthio(C)@2; Delta:H(2)C(2)(H)@3; Met->Hcy(M)@4);VSVYDTH;IIVPDDQTHEK;FCHMEEASEDIEK(Methylthio(C)@2; Oxidation(M)@4);FCHMEEASEDIEK(Methylthio(C)@2);NGLTMHFDIIVPDDQTHEK(Deamidated(N)@1);FDIIVPDDQTHEK	FCHMEEASEDIEK(Methylthio(C)@2; Delta:H(2)C(2)(H)@3; Met->Hcy(M)@4);IIVPDDQTHEK;VSVYDTH;FCHMEEASEDIEK(Methylthio(C)@2; Oxidation(M)@4);FCHMEEASEDIEK(Methylthio(C)@2);NGLTMHFDIIVPDDQTHEK(Deamidated(N)@1);FDIIVPDDQTHEK	7	10026.4	5.25	-0.578
45	9.8	9.8	30.22	30.22	25.27	tr|Q1Q539|Q1Q539_KUEST	Similar to rubrerythrin OS=Kuenenia stuttgartiensis OX=174633 GN=KSMBR1_0254 PE=4 SV=1	KUEST	8	1.1.1.1720.1;1.1.1.1622.1;1.1.1.1879.1;1.1.1.4577.1;1.1.1.8410.1;1.1.1.1770.1;1.1.1.6997.1;1.1.1.724.1;1.1.1.1626.1	9	ANLADKEGYPNAGR;ANLADKEGYPNAGR(Deamidated(N)@11);KMTEQNMINAFGGESQ(Deamidated(N)@9);LADKEGYPNAGR;DAVNNNNDPKLD;YTHFANLADKEGYPNAGR;KMTEQNMINAFGGESQ;DAVNNNNDPKLD(Deamidated(N)@7)	YTHFANLADKEGYPNAGR;KMTEQNMINAFGGESQ;ANLADKEGYPNAGR(Deamidated(N)@11);ANLADKEGYPNAGR;DAVNNNNDPKLD(Deamidated(N)@7);KMTEQNMINAFGGESQ(Deamidated(N)@9);LADKEGYPNAGR;DAVNNNNDPKLD	8	20394.1	5.88	-0.5
46	9.49	9.49	18.93	14.07	14.07	tr|Q1Q1M6|Q1Q1M6_KUEST	Similar to putative nitric oxide detoxifying norVW flavorubredoxin OS=Kuenenia stuttgartiensis OX=174633 GN=norVW PE=3 SV=1	KUEST	5	1.1.1.2277.1;1.1.1.11297.1;1.1.1.10759.1;1.1.1.10730.1;1.1.1.10886.1;1.1.1.7979.1	6	YNHLSDVVTDVL;VGEVDWDLR;YNHLSDVVTDVLDAR;LSHIPIDMIAPGHGIVWR;VVQTDEEVNIGKR	YNHLSDVVTDVL;VGEVDWDLR;YNHLSDVVTDVLDAR;LSHIPIDMIAPGHGIVWR;VVQTDEEVNIGKR	5	44515.1	6.27	-0.227
47	9.26	9.26	28.52	18.25	14.45	tr|Q1PZD9|Q1PZD9_KUEST	Uncharacterized protein OS=Kuenenia stuttgartiensis OX=174633 GN=kustd1699 PE=4 SV=1	KUEST	5	1.1.1.4127.1;1.1.1.2065.1;1.1.1.6741.1;1.1.1.4223.1;1.1.1.4110.1;1.1.1.4238.1;1.1.1.3407.1;1.1.1.3507.1;1.1.1.8699.1	9	LSQEVTVETGK;LKELSQEVTVETGK;AALSAEEAADALK;HNVFSPPTAAL;ELSQEVTVETGK	LKELSQEVTVETGK;LSQEVTVETGK;AALSAEEAADALK;HNVFSPPTAAL;ELSQEVTVETGK	5	29311	9.12	-0.174
48	8.8	8.8	46.03	36.9	22.62	tr|Q1PZE4|Q1PZE4_KUEST	Uncharacterized protein OS=Kuenenia stuttgartiensis OX=174633 GN=kustd1713 PE=4 SV=1	KUEST	9	1.1.1.5509.1;1.1.1.5279.1;1.1.1.6799.1;1.1.1.4544.1;1.1.1.2380.1;1.1.1.2864.1;1.1.1.2605.1;1.1.1.7778.1;1.1.1.2488.1;1.1.1.7879.1;1.1.1.8638.1	11	ASEDLVINSGNMGIK(Deamidated(N)@8; Oxidation(M)@12);NAVVSLDSIEVGK;KFDVPEIVK;NPAFNEGVSGNGK(Deamidated(N)@11);ASEDLVINSGNMGIK(Oxidation(M)@12);ASEDLVINSGNMGIK(Deamidated(N)@8);NPAFNEGVSGNGK(Deamidated(N)@5; Deamidated(N)@11);ASEDLVINSGNMGIK;ISVWQEK	ASEDLVINSGNMGIK(Deamidated(N)@8; Oxidation(M)@12);KFDVPEIVK;NAVVSLDSIEVGK;ASEDLVINSGNMGIK(Oxidation(M)@12);NPAFNEGVSGNGK(Deamidated(N)@11);ASEDLVINSGNMGIK(Deamidated(N)@8);NPAFNEGVSGNGK(Deamidated(N)@5; Deamidated(N)@11);ASEDLVINSGNMGIK;ISVWQEK	9	26943.2	6.96	0.063
49	8.52	8.52	36.81	32.42	32.42	tr|Q1PZD3|Q1PZD3_KUEST	Conserved hypothetical (Monoheme) protein OS=Kuenenia stuttgartiensis OX=174633 GN=c556 PE=4 SV=1	KUEST	6	1.1.1.443.1;1.1.1.5398.1;1.1.1.3133.1;1.1.1.5329.1;1.1.1.2046.1;1.1.1.1686.1;1.1.1.9320.1	7	EAGAVVDQSYK;AAEHEGVIEPTQELMKDIEK;YVANEAGAVVDQSYK;FDQPGSHGPGR;MAMEGSQEETLK;KMAMEGSQEETLK	EAGAVVDQSYK;AAEHEGVIEPTQELMKDIEK;YVANEAGAVVDQSYK;MAMEGSQEETLK;FDQPGSHGPGR;KMAMEGSQEETLK	6	20461.7	7.74	-0.29
50	8.36	8.36	18.35	15.76	13.18	tr|Q1PY52|Q1PY52_KUEST	Similar to iron-sulfur cofactor synthesis protein NifS OS=Kuenenia stuttgartiensis OX=174633 GN=nifS PE=3 SV=1	KUEST	4	1.1.1.3983.1;1.1.1.7260.1;1.1.1.9006.1;1.1.1.4039.1;1.1.1.8424.1	5	DMLHDGLLGK(Carboxyethyl(K)@10);AGTENVIGIVGMGK;FANGEIGTIEPIR(Deamidated(N)@3);EGYGNPSNIHQFGR	DMLHDGLLGK(Carboxyethyl(K)@10);AGTENVIGIVGMGK;FANGEIGTIEPIR(Deamidated(N)@3);EGYGNPSNIHQFGR	4	41593.9	6.38	0.004
51	8.26	8.26	44.29	31.51	27.4	tr|Q1PXZ5|Q1PXZ5_KUEST	Uncharacterized protein OS=Kuenenia stuttgartiensis OX=174633 GN=KSMBR1_1881 PE=4 SV=1	KUEST	8	1.1.1.5546.1;1.1.1.11035.1;1.1.1.7046.1;1.1.1.7021.1;1.1.1.4859.1;1.1.1.6510.1;1.1.1.2551.1;1.1.1.8343.1;1.1.1.6623.1	9	IFGNEDLYIPMR;RDTSMDIMK;EFVAPNLEK;CLDFNDKDTAAIKQ(Methylthio(C)@1; Deamidated(N)@5);QSVEEFVAPNLEK;CLDFNDKDTAAIK(Methylthio(C)@1);MDETGNISDEYVK;CLDFNDKDTAAIK(Methylthio(C)@1; Deamidated(N)@5)	IFGNEDLYIPMR;RDTSMDIMK;EFVAPNLEK;CLDFNDKDTAAIKQ(Methylthio(C)@1; Deamidated(N)@5);QSVEEFVAPNLEK;CLDFNDKDTAAIK(Methylthio(C)@1);MDETGNISDEYVK;CLDFNDKDTAAIK(Methylthio(C)@1; Deamidated(N)@5)	8	26343.5	6.12	-0.294
52	7.73	7.73	36.75	36.75	27.71	tr|A0A2C9CAZ0|A0A2C9CAZ0_KUEST	Uncharacterized protein OS=Kuenenia stuttgartiensis OX=174633 GN=KSMBR1_0309 PE=4 SV=1	KUEST	5	1.1.1.3656.1;1.1.1.9477.1;1.1.1.9583.1;1.1.1.10793.1;1.1.1.7070.1;1.1.1.9457.1	6	DLEHAVNNILE;DFANYVDEINK;SEGQIITHEQTGKHEGVNLPVK;KDFANYVDEINKQ;DFANYVDEINKQ	DLEHAVNNILE;DFANYVDEINK;SEGQIITHEQTGKHEGVNLPVK;KDFANYVDEINKQ;DFANYVDEINKQ	5	18791.3	7.79	-0.464
53	7.52	7.52	17.87	14.93	14.93	tr|Q1PWU1|Q1PWU1_KUEST	Transaldolase OS=Kuenenia stuttgartiensis OX=174633 GN=talB PE=3 SV=1	KUEST	5	1.1.1.3064.1;1.1.1.3430.1;1.1.1.9760.1;1.1.1.12326.1;1.1.1.11218.1	5	IDTLLDSIIEAR;LANETQGTIVEAR;LANETQGTIVEAR(Deamidated(N)@3);DIQDAADVLMPVYEK;EYGLGGVTSNPAIFEK	IDTLLDSIIEAR;LANETQGTIVEAR;LANETQGTIVEAR(Deamidated(N)@3);DIQDAADVLMPVYEK;EYGLGGVTSNPAIFEK	5	41954	5.54	-0.226
54	7.38	7.38	37	37	26.5	tr|A0A2C9CJW6|A0A2C9CJW6_KUEST	NAD(P)H dehydrogenase (quinone) OS=Kuenenia stuttgartiensis OX=174633 GN=wrbA PE=3 SV=1	KUEST	6	1.1.1.2751.1;1.1.1.11132.1;1.1.1.11126.1;1.1.1.6088.1;1.1.1.13298.1;1.1.1.2851.1;1.1.1.2720.1;1.1.1.6324.1	8	FQGAHVAEITR;TLADIDGSR;RVPDLVPEDVAR;LDQAAPIAEVEELPNYDAIIF;LDQAAPIAEVEELPNYD(Oxidation(P)@14; Deamidated(N)@15);LDQAAPIAEVEELPNYD	FQGAHVAEITR;TLADIDGSR;RVPDLVPEDVAR;LDQAAPIAEVEELPNYDAIIF;LDQAAPIAEVEELPNYD(Oxidation(P)@14; Deamidated(N)@15);LDQAAPIAEVEELPNYD	6	21773.8	5.86	-0.112
55	7.31	7.31	17.55	12.05	10.57	tr|Q1Q3L8|Q1Q3L8_KUEST	Uncharacterized protein OS=Kuenenia stuttgartiensis OX=174633 GN=kuste3839 PE=4 SV=1	KUEST	4	1.1.1.6052.1;1.1.1.7341.1;1.1.1.7986.1;1.1.1.10943.1;1.1.1.5940.1;1.1.1.5986.1	6	NNTDGQIFEIDNELYLEHPGIK;FIGEDQINHTPVHEEIK;IHETEWEISIR;EIDNELYLEHPGIK	NNTDGQIFEIDNELYLEHPGIK;FIGEDQINHTPVHEEIK;EIDNELYLEHPGIK;IHETEWEISIR	4	54181.6	5.95	-0.385
56	7.27	7.27	36.25	22.01	22.01	tr|Q1Q2R6|Q1Q2R6_KUEST	Strongly similar to cysteine synthase (O-acetylserine sulfhydrylase) OS=Kuenenia stuttgartiensis OX=174633 GN=cysK PE=4 SV=1	KUEST	5	1.1.1.9848.1;1.1.1.7894.1;1.1.1.8007.1;1.1.1.7742.1;1.1.1.10701.1;1.1.1.10427.1	6	IIDEIVKVENEQAF;IYDDITATIGNTPLVR;IDIFVGG;VGGVGTGGTITGVGEVIK;AFGAEIVLTPGSEGMK	IIDEIVKVENEQAF;IYDDITATIGNTPLVR;IDIFVGG;VGGVGTGGTITGVGEVIK;AFGAEIVLTPGSEGMK	5	33003.3	6.25	-0.004
57	7.08	7.08	18.72	17.06	12.09	tr|Q1PUL7|Q1PUL7_KUEST	Strongly similar to threonine synthase OS=Kuenenia stuttgartiensis OX=174633 GN=thrC PE=4 SV=1	KUEST	4	1.1.1.10912.1;1.1.1.1965.1;1.1.1.3427.1;1.1.1.7638.1	4	IINPSLAEFDKVMEEK;EVDYDYEGIKK;EDVTDDELVEGIK;TAGGVTVAVTK	IINPSLAEFDKVMEEK;EVDYDYEGIKK;EDVTDDELVEGIK;TAGGVTVAVTK	4	46068.1	6.85	-0.14
58	7.07	7.07	44.71	44.71	44.71	tr|Q1PV82|Q1PV82_KUEST	Similar to glutaredoxin-like protein OS=Kuenenia stuttgartiensis OX=174633 GN=nrd PE=4 SV=1	KUEST	4	1.1.1.11585.1;1.1.1.4487.1;1.1.1.6072.1;1.1.1.6104.1;1.1.1.5957.1	5	NADYISYDIDKDEDAR;IVGTDDIESLDKLPIVVVNEDK;YISYDIDKDEDAR;DKLPIVVVNEDK	NADYISYDIDKDEDAR;IVGTDDIESLDKLPIVVVNEDK;YISYDIDKDEDAR;DKLPIVVVNEDK	4	9838.3	4.84	-0.34
59	6.89	6.89	16.62	16.62	16.62	tr|A0A2C9CC12|A0A2C9CC12_KUEST	Histidinol-phosphate aminotransferase OS=Kuenenia stuttgartiensis OX=174633 GN=hisC PE=3 SV=1	KUEST	4	1.1.1.8501.1;1.1.1.12343.1;1.1.1.12578.1;1.1.1.4351.1	4	FTEDYILPEDFIVK;VMAGNGSDDLLSIIVR(Deamidated(N)@5);VSFIANPNSPSGTMISPR;MTGYIPGEQPR	FTEDYILPEDFIVK;VMAGNGSDDLLSIIVR(Deamidated(N)@5);VSFIANPNSPSGTMISPR;MTGYIPGEQPR	4	39918.3	6.35	-0.115
60	6.82	6.82	19.24	19.24	19.24	tr|A0A3A0C1H5|A0A3A0C1H5_9BACT	Nitrite oxidoreductase, gamma subunit OS=Nitrospira sp. OX=70125 GN=DCC63_11045 PE=4 SV=1	9BACT	5	1.1.1.3213.1;1.1.1.3610.1;1.1.1.5342.1;1.1.1.6814.1;1.1.1.7255.1	5	AVWDGSNIERNGMK(Deamidated(N)@11);TLETGDANDTQFK(Deamidated(N)@8);AHQDVIGNGVWEPSGSVK(Deamidated(N)@8);TLETGDANDTQFK;LDWADQTKNDTAIGPQ	AVWDGSNIERNGMK(Deamidated(N)@11);TLETGDANDTQFK(Deamidated(N)@8);AHQDVIGNGVWEPSGSVK(Deamidated(N)@8);TLETGDANDTQFK;LDWADQTKNDTAIGPQ	5	34346.3	5.75	-0.081
61	6.79	6.79	22.73	19.83	14.88	tr|Q1Q303|Q1Q303_KUEST	Uncharacterized protein OS=Kuenenia stuttgartiensis OX=174633 GN=KSMBR1_0074 PE=4 SV=1	KUEST	4	1.1.1.12215.1;1.1.1.11936.1;1.1.1.6998.1;1.1.1.10683.1	4	TFLYDVPLHDLY;EIIVSVDGEYR;TFLYDVPLHDL;ISELIPECQPIHQ(Methylthio(C)@8)	TFLYDVPLHDLY;EIIVSVDGEYR;TFLYDVPLHDL;ISELIPECQPIHQ(Methylthio(C)@8)	4	28160.1	5.91	-0.33
62	6.77	6.77	50	41.67	39.58	tr|Q1PY42|Q1PY42_KUEST	10 kDa chaperonin OS=Kuenenia stuttgartiensis OX=174633 GN=groES PE=3 SV=1	KUEST	3	1.1.1.3220.1;1.1.1.2560.1;1.1.1.4109.1;1.1.1.2670.1;1.1.1.2568.1	5	YAGTEVTVDGKE;DDRVVVQPMEAEEK;TKGGIVLPETAK	YAGTEVTVDGKE;DDRVVVQPMEAEEK;TKGGIVLPETAK	3	10436.2	6.31	-0.184
63	6.54	6.54	32.45	21.81	21.81	tr|A0A2C9CK93|A0A2C9CK93_KUEST	Flavoredoxin OS=Kuenenia stuttgartiensis OX=174633 GN=flr PE=4 SV=1	KUEST	4	1.1.1.6091.1;1.1.1.8475.1;1.1.1.6242.1;1.1.1.7038.1	4	LLHTFEIGLHTQ;AYTINIPSEK;AEESALNNDGVPDIEK(Deamidated(N)@8);DVKAEESALNNDGVPDIEK	LLHTFEIGLHTQ;AYTINIPSEK;AEESALNNDGVPDIEK(Deamidated(N)@8);DVKAEESALNNDGVPDIEK	4	20565.8	6.72	-0.001
64	6.18	6.18	39.55	34.46	27.68	tr|Q1Q048|Q1Q048_KUEST	Uncharacterized protein OS=Kuenenia stuttgartiensis OX=174633 GN=KSMBR1_1708 PE=4 SV=1	KUEST	4	1.1.1.3026.1;1.1.1.3920.1;1.1.1.1883.1;1.1.1.4233.1	4	YVANEAGAIVDK;AMEHEEVIAPTK;AGIDPADTGEIAK;MAMSGNQEETLR	AMEHEEVIAPTK;YVANEAGAIVDK;AGIDPADTGEIAK;MAMSGNQEETLR	4	20136.1	6.91	-0.362
65	6.14	6.14	18.23	16.01	16.01	tr|Q1Q2X4|Q1Q2X4_KUEST	3-oxoacyl-[acyl-carrier-protein] synthase 2 OS=Kuenenia stuttgartiensis OX=174633 GN=fabF PE=3 SV=1	KUEST	5	1.1.1.8261.1;1.1.1.5568.1;1.1.1.9486.1;1.1.1.2994.1;1.1.1.5833.1	5	GVGMITPIGSGK;SANLRPEDVQYISAH;GTGTPANDKAETISIK(Deamidated(N)@7);IAIEFGLK;VDVMVAGGSDPFSK	GVGMITPIGSGK;SANLRPEDVQYISAH;GTGTPANDKAETISIK(Deamidated(N)@7);VDVMVAGGSDPFSK;IAIEFGLK	5	43447.9	5.77	-0.002
66	5.96	5.96	11.57	11.57	11.57	tr|Q1Q6L7|Q1Q6L7_KUEST	Conserved hypothetical (Diheme) protein OS=Kuenenia stuttgartiensis OX=174633 GN=kuste2478 PE=4 SV=1	KUEST	3	1.1.1.5638.1;1.1.1.1779.1;1.1.1.13273.1	3	IGAAVSVSR;KEDDMVFNGLSEMGIPGLL(Deamidated(N)@8);ISSEININKEDWNK	IGAAVSVSR;KEDDMVFNGLSEMGIPGLL(Deamidated(N)@8);ISSEININKEDWNK	3	40020.9	7.06	-0.001
67	5.95	5.95	19.53	13.26	10.47	tr|Q1PYT0|Q1PYT0_KUEST	Enolase OS=Kuenenia stuttgartiensis OX=174633 GN=eno PE=3 SV=1	KUEST	3	1.1.1.6144.1;1.1.1.4445.1;1.1.1.4394.1;1.1.1.7400.1	4	DSAASEFYQEGK;SNGYNTNVGDEGGFAPNLK(Deamidated(N)@2);IEEDLSDNAIYGGK	DSAASEFYQEGK;IEEDLSDNAIYGGK;SNGYNTNVGDEGGFAPNLK(Deamidated(N)@2)	3	46648.1	5.42	-0.19
68	5.63	5.63	20.31	8.997	8.74	tr|Q1Q354|Q1Q354_KUEST	Sulfate adenylyltransferase OS=Kuenenia stuttgartiensis OX=174633 GN=sat PE=3 SV=1	KUEST	3	1.1.1.5810.1;1.1.1.4034.1;1.1.1.6928.1	3	MLSEGEAPPPTFTR;MDDYLLGGK;ESLEVYGTDDK	MLSEGEAPPPTFTR;ESLEVYGTDDK;MDDYLLGGK	3	43968.3	6.29	-0.32
69	5.57	5.57	28.3	28.3	21.38	tr|A0A3A0BSV0|A0A3A0BSV0_9BACT	Uncharacterized protein OS=Nitrospira sp. OX=70125 GN=DCC63_17960 PE=4 SV=1	9BACT	3	1.1.1.7827.1;1.1.1.8128.1;1.1.1.1401.1	3	AEVVLKPGETK;PPVTVIDFK;MTDAVNAGSPFVMK	AEVVLKPGETK;PPVTVIDFK;MTDAVNAGSPFVMK	3	16890.7	6.9	0.286
70	5.43	5.43	24.62	17.69	17.69	tr|Q1Q2R8|Q1Q2R8_KUEST	Similar to fructose-1,6-biphosphate aldolase class I OS=Kuenenia stuttgartiensis OX=174633 GN=fba PE=4 SV=1	KUEST	3	1.1.1.2082.1;1.1.1.8691.1;1.1.1.11509.1	3	DLANEEITTSMEEALR;AIVHENASVDEAD;VGSDREVFEFVHDGMQK	DLANEEITTSMEEALR;AIVHENASVDEAD;VGSDREVFEFVHDGMQK	3	28642.3	8.36	-0.152
71	5.4	5.4	20.04	13.54	8.484	tr|A0A2C9CFB6|A0A2C9CFB6_KUEST	Uncharacterized protein OS=Kuenenia stuttgartiensis OX=174633 GN=hao_1 PE=4 SV=1	KUEST	3	1.1.1.7851.1;1.1.1.3163.1;1.1.1.10410.1;1.1.1.7816.1	4	INLVIYEDGFKEDYPDTR;EGGKPVIDPDTWPNSGIGR;IVQEETLVNK	INLVIYEDGFKEDYPDTR;EGGKPVIDPDTWPNSGIGR;IVQEETLVNK	3	63005.4	6.1	-0.59
72	5.02	5.02	36.6	31.37	26.14	tr|Q1Q7P0|Q1Q7P0_KUEST	Uncharacterized protein OS=Kuenenia stuttgartiensis OX=174633 GN=KSMBR1_3086 PE=4 SV=1	KUEST	3	1.1.1.4292.1;1.1.1.4855.1;1.1.1.2183.1	3	TIDFSEKEEQSEGESGKR;LDSDQEVYIEK;ALADFHKDYLK	LDSDQEVYIEK;TIDFSEKEEQSEGESGKR;ALADFHKDYLK	3	16979.7	5.45	-0.154
73	4.93	4.93	71.28	57.45	44.68	tr|Q1PUP8|Q1PUP8_KUEST	Similar to molybdopterin synthase subunit 1 OS=Kuenenia stuttgartiensis OX=174633 GN=moaD PE=4 SV=1	KUEST	4	1.1.1.3147.1;1.1.1.4829.1;1.1.1.4948.1;1.1.1.11273.1;1.1.1.9864.1	5	FLNNLETPVKDGDYIS;FLNNLETPVKDGDYISVVPA;YLNDEDIR;TFTDGVEEVKVEGK	FLNNLETPVKDGDYIS;FLNNLETPVKDGDYISVVPA;YLNDEDIR;TFTDGVEEVKVEGK	4	10534	4.73	-0.227
74	4.82	4.82	13.9	13.9	10.16	tr|Q1PZ48|Q1PZ48_KUEST	Urocanate hydratase OS=Kuenenia stuttgartiensis OX=174633 GN=hutU PE=3 SV=1	KUEST	3	1.1.1.10278.1;1.1.1.12826.1;1.1.1.6420.1	3	VLTADPGIGIAR;ALSGDTADIDKIDQAIIENFPDDTALVR;GITPDIVTDQTPAHDLM	VLTADPGIGIAR;ALSGDTADIDKIDQAIIENFPDDTALVR;GITPDIVTDQTPAHDLM	3	61649.7	6.25	-0.175
75	4.39	4.39	20.09	12.23	10.04	tr|Q1PVE9|Q1PVE9_KUEST	Similar to (R)-citramalate synthase OS=Kuenenia stuttgartiensis OX=174633 GN=cimA PE=4 SV=1	KUEST	3	1.1.1.4288.1;1.1.1.4180.1;1.1.1.13236.1;1.1.1.8011.1	4	QIVDLFDMIHK(Gln->pyro-Glu@N-term);GVGVSYPGAAPPR;NTLEPEEHHFELKDSEEPNLFR	GVGVSYPGAAPPR;QIVDLFDMIHK(Gln->pyro-Glu@N-term);NTLEPEEHHFELKDSEEPNLFR	3	52206	5.86	-0.332
76	4.35	4.35	26.57	16.29	12.57	tr|Q1PUX6|Q1PUX6_KUEST	Delta-aminolevulinic acid dehydratase OS=Kuenenia stuttgartiensis OX=174633 GN=hemB PE=3 SV=1	KUEST	2	1.1.1.9021.1;1.1.1.7459.1;1.1.1.7513.1;1.1.1.7569.1	4	GIPEVKDELGSDAYSDAGIIQK;EAVSHANAGADIIAPSDMMDGR	GIPEVKDELGSDAYSDAGIIQK;EAVSHANAGADIIAPSDMMDGR	2	39402.4	5.45	-0.161
77	4.24	4.24	15.47	12.29	7.203	tr|Q1Q2Y9|Q1Q2Y9_KUEST	Dihydrolipoyl dehydrogenase OS=Kuenenia stuttgartiensis OX=174633 GN=pdhD PE=3 SV=1	KUEST	2	1.1.1.8719.1;1.1.1.5310.1	2	EDILPSEDKEINGTVK(Deamidated(N)@12);IISNQEVSIVSDGIETNR	EDILPSEDKEINGTVK(Deamidated(N)@12);IISNQEVSIVSDGIETNR	2	51239.1	5.67	0.064
78	4.11	4.11	16.97	13.32	10.44	tr|Q1Q0I8|Q1Q0I8_KUEST	Similar to selenocysteine lyase OS=Kuenenia stuttgartiensis OX=174633 GN=csdB PE=3 SV=1	KUEST	3	1.1.1.2310.1;1.1.1.7619.1;1.1.1.7098.1	3	LESGTPNTVGIVGLK;NDIANETIH;APFGPTGTGGLYIHER	LESGTPNTVGIVGLK;NDIANETIH;APFGPTGTGGLYIHER	3	42055.1	6.43	-0.148
79	4.08	136.91	55.92	50.47	46.42	tr|A0A2C9CJB5|A0A2C9CJB5_KUEST	Hydrazine dehydrogenase OS=Kuenenia stuttgartiensis OX=174633 GN=hdh PE=4 SV=1	KUEST	115	1.1.1.10377.1;1.1.1.11834.1;1.1.1.1584.1;1.1.1.10125.1;1.1.1.7252.1;1.1.1.3564.1;1.1.1.7921.1;1.1.1.9281.1;1.1.1.10457.1;1.1.1.4242.1;1.1.1.9603.1;1.1.1.3264.1;1.1.1.4794.1;1.1.1.8363.1;1.1.1.11687.1;1.1.1.7456.1;1.1.1.7519.1;1.1.1.3256.1;1.1.1.3349.1;1.1.1.6396.1;1.1.1.7615.1;1.1.1.8614.1;1.1.1.12113.1;1.1.1.5073.1;1.1.1.9052.1;1.1.1.8395.1;1.1.1.6973.1;1.1.1.8621.1;1.1.1.6233.1;1.1.1.7602.1;1.1…	178	ASIVYTSMGMSMADR;WVPHEVYGMPGEPDNSGK(Oxidation(M)@9);VGISWQPEQFWK(Oxidation(W)@11);VAEDLLIDGVLDPMPK(Cation:Na(D)@8);LIDGVLDPMPK;WVPHEVYGMPGEPDN;KVGISWQPEQFWK(Carbamyl@N-term);SPYPGKY;WDTEQFDFSKK;SMGMSMADR;QVNKWDTEQFDFSK(Gln->pyro-Glu@N-term; Oxidation(W)@5);QVNKWDTEQFDFSK(Dioxidation(W)@5);DHRDWEAYDIGLHGTVY;ENLQAMDESVKDASLK(Glu->pyro-Glu@N-term; Deamidated(N)@2);HAPAEEVEYIERK;DESVKDASLK;VPHEVYGMPGE…	LGITAGSH;ELGITAGSHS;LKELGITAGSH;SAHHHESGHDPAAR	4	72496.1	8.17	-0.61
80	4.02	4.02	10.33	10.33	6.801	tr|Q1Q4Z5|Q1Q4Z5_KUEST	Strongly similar to phosphonopyruvate decarboxylase OS=Kuenenia stuttgartiensis OX=174633 GN=ppd PE=4 SV=1	KUEST	2	1.1.1.4641.1;1.1.1.10300.1	2	GYNPSDYYTGR;IIGPITDAGNSFQELR	GYNPSDYYTGR;IIGPITDAGNSFQELR	2	44189.4	5.5	-0.29
81	4.01	4.01	12.89	5.778	5.778	tr|A0A399ZDQ8|A0A399ZDQ8_9CHLR	Uncharacterized protein OS=Anaerolineae bacterium OX=2052143 GN=DCC54_03110 PE=4 SV=1	9CHLR	2	1.1.1.7383.1;1.1.1.7419.1	2	FHAGGDLTPSDVAY;AADLDKDGKPAGEDDEGDVWTTGFR	FHAGGDLTPSDVAY;AADLDKDGKPAGEDDEGDVWTTGFR	2	74005.2	4.31	-0.282
82	4	4	5.373	4.333	4.333	tr|A0A136KPN5|A0A136KPN5_9CHLR	Putative dipeptide ABC transporter OS=Chloroflexi bacterium OLB14 OX=1617415 GN=UZ14_CFX002002863 PE=4 SV=1	9CHLR	2	1.1.1.10983.1;1.1.1.10892.1	2	LADLDKDGIPAGEDPEGDIWTTGFR;GIPAGEDPEGDIWTTGFR	LADLDKDGIPAGEDPEGDIWTTGFR;GIPAGEDPEGDIWTTGFR	2	63434.32	4.18	-0.205
83	3.96	3.96	2.855	1.883	1.883	tr|A0A3A0C2T3|A0A3A0C2T3_9BACT	Uncharacterized protein OS=Nitrospira sp. OX=70125 GN=DCC63_03070 PE=4 SV=1	9BACT	2	1.1.1.2526.1;1.1.1.6747.1	2	GSQYRDPVTGADVSQK;ADVIVDASLPENAGK	GSQYRDPVTGADVSQK;ADVIVDASLPENAGK	2	181466	5.92	-0.483
84	3.75	3.75	9.797	5.176	5.176	tr|Q1PVK4|Q1PVK4_KUEST	Similar to phosphoglucomutase OS=Kuenenia stuttgartiensis OX=174633 GN=pgm PE=3 SV=1	KUEST	2	1.1.1.10326.1;1.1.1.6511.1	2	EEEFGAYYPER;TEDDYLFGGISPEPSAR	EEEFGAYYPER;TEDDYLFGGISPEPSAR	2	59766.4	6.6	-0.213
85	3.71	3.71	18.03	18.03	9.871	tr|Q1Q0K5|Q1Q0K5_KUEST	Uncharacterized protein OS=Kuenenia stuttgartiensis OX=174633 GN=kuste2771 PE=4 SV=1	KUEST	2	1.1.1.3798.1;1.1.1.10917.1	2	YGADAEALLGEVYK;SIIIEGETR	YGADAEALLGEVYK;SIIIEGETR	2	25537	6.1	-0.357
86	3.64	3.64	30.3	15.76	15.76	tr|Q1Q1N9|Q1Q1N9_KUEST	Similar to inosine-5'-monophosphate dehydrogenase related protein II OS=Kuenenia stuttgartiensis OX=174633 GN=PAB2191 PE=4 SV=1	KUEST	2	1.1.1.4734.1;1.1.1.4610.1;1.1.1.4648.1;1.1.1.8541.1	4	SLEQVTAEDIMTK;KPICVEEDTTIEK(Methylthio(C)@4)	SLEQVTAEDIMTK;KPICVEEDTTIEK(Methylthio(C)@4)	2	18469.6	5.69	-0.042
87	3.46	3.46	11.66	9.202	9.202	tr|Q1Q0Z6|Q1Q0Z6_KUEST	Uncharacterized protein OS=Kuenenia stuttgartiensis OX=174633 GN=KSMBR1_2764 PE=4 SV=1	KUEST	2	1.1.1.4286.1;1.1.1.4290.1;1.1.1.5112.1	3	SENSNFNADFTGNPR;NILNHYEDNSEVQEK	NILNHYEDNSEVQEK;SENSNFNADFTGNPR	2	37240	5.75	-0.728
88	3.26	3.26	20.75	18.49	9.057	tr|Q1Q7N9|Q1Q7N9_KUEST	Hemerythrin HHE cation binding domain protein OS=Kuenenia stuttgartiensis OX=174633 GN=KSMBR1_3087 PE=4 SV=1	KUEST	2	1.1.1.3540.1;1.1.1.10458.1	2	KEDEILYPWIDR;AIYPDREVPEPK	KEDEILYPWIDR;AIYPDREVPEPK	2	30635.3	5.04	-0.33
89	3.26	3.26	7.836	5.622	5.622	tr|Q1PUK7|Q1PUK7_KUEST	Formate--tetrahydrofolate ligase OS=Kuenenia stuttgartiensis OX=174633 GN=ftsH PE=3 SV=1	KUEST	3	1.1.1.5266.1;1.1.1.8744.1;1.1.1.5250.1;1.1.1.1218.1	4	TVYELADKL;RVDVDVETGK;MQHEFNYDDATLAK	TVYELADKL;RVDVDVETGK;MQHEFNYDDATLAK	3	63482.4	7.56	-0.089
90	3.11	3.11	28.13	21.88	21.88	tr|A0A1G2ZGG2|A0A1G2ZGG2_9BACT	Glycine cleavage system H protein OS=Planctomycetes bacterium RBG_16_41_13 OX=1801966 GN=gcvH PE=3 SV=1	9BACT	2	1.1.1.12484.1;1.1.1.5818.1	2	ESPQLINEDPYGK;LHIEISNPNELADIL	ESPQLINEDPYGK;LHIEISNPNELADIL	2	14333.1	4.88	-0.451
91	3.06	3.06	11.17	8.495	7.039	tr|Q1Q2X3|Q1Q2X3_KUEST	Similar to beta-ketoacyl acyl carrier protein synthase II OS=Kuenenia stuttgartiensis OX=174633 GN=fabF PE=3 SV=1	KUEST	2	1.1.1.4822.1;1.1.1.9939.1	2	ILAGSNSGTLEISAPFDK;SGVYGDAMEVR	ILAGSNSGTLEISAPFDK;SGVYGDAMEVR	2	44112.2	5.77	0.009
92	3	3	45.83	45.83	45.83	tr|Q1Q0K4|Q1Q0K4_KUEST	Uncharacterized protein OS=Kuenenia stuttgartiensis OX=174633 GN=KSMBR1_3621 PE=4 SV=1	KUEST	2	1.1.1.11584.1;1.1.1.10536.1	2	LKEIIPEIESVELA;LQADGGDIELVDYEDGIVK	LKEIIPEIESVELA;LQADGGDIELVDYEDGIVK	2	7758	4.76	-0.069
93	2.92	2.92	18.53	13.79	13.79	tr|Q1Q6P8|Q1Q6P8_KUEST	Phosphoesterase OS=Kuenenia stuttgartiensis OX=174633 GN=kuste2505 PE=3 SV=1	KUEST	2	1.1.1.8646.1;1.1.1.5346.1	2	ILIISDIHGNEAALK;KVGEITVVNPGSVGQPR	ILIISDIHGNEAALK;KVGEITVVNPGSVGQPR	2	25445.3	6	-0.196
94	2.9	2.9	18.1	14.76	14.76	tr|Q1PVC6|Q1PVC6_KUEST	Similar to hydroxyacylglutathione hydrolase (Glyoxalase II) OS=Kuenenia stuttgartiensis OX=174633 GN=hagH PE=4 SV=1	KUEST	2	1.1.1.11308.1;1.1.1.3620.1	2	YLIDNEELPLGDEVIR;SDNTAAVIDAGGNVK	YLIDNEELPLGDEVIR;SDNTAAVIDAGGNVK	2	23028.3	5.58	-0.03
95	2.83	2.83	16.99	13.14	3.846	tr|Q1PYD6|Q1PYD6_KUEST	Similar to Tpr region of human peroxisomal targeting signal-1 receptor Pex5 OS=Kuenenia stuttgartiensis OX=174633 GN=KSMBR1_1214 PE=4 SV=1	KUEST	1	1.1.1.9880.1	1	ALEVDPEFYDVH	ALEVDPEFYDVH	1	34785.5	5.8	-0.326
96	2.59	2.59	10.73	7.073	4.39	tr|Q1Q6Y1|Q1Q6Y1_KUEST	Uncharacterized protein OS=Kuenenia stuttgartiensis OX=174633 GN=kuste2592 PE=4 SV=1	KUEST	1	1.1.1.11162.1	1	GLTLFDVDELPTHGGSLR	GLTLFDVDELPTHGGSLR	1	46808.7	6.47	-0.226
97	2.5	2.5	30.16	22.22	14.29	tr|Q1PYP7|Q1PYP7_KUEST	Rna binding protein OS=Kuenenia stuttgartiensis OX=174633 GN=rdb1 PE=4 SV=1	KUEST	1	1.1.1.13132.1	1	QTTEEELKQVFEEFGQVT	QTTEEELKQVFEEFGQVT	1	12904.1	9.97	-0.809
98	2.49	2.49	14.65	7.643	4.14	tr|Q1PXG5|Q1PXG5_KUEST	Thioredoxin reductase OS=Kuenenia stuttgartiensis OX=174633 GN=trxB PE=3 SV=1	KUEST	1	1.1.1.7998.1	1	KLDIPGENEFYGR	KLDIPGENEFYGR	1	34003.9	5.38	0.045
99	2.46	2.46	17.2	9.873	3.503	tr|Q1Q3M3|Q1Q3M3_KUEST	Similar to alcohol dehydrogenase OS=Kuenenia stuttgartiensis OX=174633 GN=adh PE=4 SV=1	KUEST	1	1.1.1.3461.1	1	AMLENDELKPH	AMLENDELKPH	1	34331.6	5.05	0.013
100	2.42	2.42	24.26	10.65	7.692	tr|Q1Q3V0|Q1Q3V0_KUEST	Strongly similar to 3-deoxy-D-arabino-heptulosonate 7-phosphate synthase OS=Kuenenia stuttgartiensis OX=174633 GN=aroA PE=4 SV=1	KUEST	2	1.1.1.7867.1;1.1.1.6105.1	2	EMTHLPVIVDPSHGTGK;GLMEEGLIH	EMTHLPVIVDPSHGTGK;GLMEEGLIH	2	36842.9	6.52	0.007
101	2.37	2.37	11.95	11.95	6.195	tr|Q1Q131|Q1Q131_KUEST	50S ribosomal protein L1 OS=Kuenenia stuttgartiensis OX=174633 GN=rplA PE=3 SV=1	KUEST	1	1.1.1.6118.1	1	DAGAEEVGAEDLVK	DAGAEEVGAEDLVK	1	24396.4	9.28	-0.129
102	2.34	2.34	25.99	20.9	9.04	tr|Q1PVM6|Q1PVM6_KUEST	Strongly similar to peroxiredoxin (Thioredoxin peroxidase) OS=Kuenenia stuttgartiensis OX=174633 GN=kustc0541 PE=4 SV=1	KUEST	1	1.1.1.9695.1	1	GVVGEKFEDFSLDNYK	GVVGEKFEDFSLDNYK	1	19787.9	6.15	-0.075
103	2.26	2.26	5.435	4.193	2.174	tr|Q1PYX4|Q1PYX4_KUEST	Conserved hypothetical iron sulfur / metal binding protein part of the CODH/ACS complex OS=Kuenenia stuttgartiensis OX=174633 GN=KSMBR1_1322 PE=4 SV=1	KUEST	1	1.1.1.10321.1;1.1.1.10369.1	2	FLPNDITVEIEPGK	FLPNDITVEIEPGK	1	70221.6	5.15	0.003
104	2.25	2.25	35.9	19.23	10.9	tr|A0A2C9CFF5|A0A2C9CFF5_KUEST	Uncharacterized protein OS=Kuenenia stuttgartiensis OX=174633 GN=ptsN_3 PE=4 SV=1	KUEST	1	1.1.1.12254.1	1	GIEGMVDTLKEVDGIQV	GIEGMVDTLKEVDGIQV	1	17057.7	5.46	-0.002
105	2.24	2.24	24.9	10.34	6.13	tr|Q1PYX7|Q1PYX7_KUEST	Similar to 5-methyltetrahydrofolate/corrinoid Fe-S protein methyltransferase (AcsE) of the CODH/ACS complex OS=Kuenenia stuttgartiensis OX=174633 GN=acsE PE=4 SV=1	KUEST	1	1.1.1.7079.1	1	DVNVGPAATDPVDAMK	DVNVGPAATDPVDAMK	1	29189.8	4.87	-0.141
106	2.14	2.14	43.38	19.85	10.29	tr|Q1Q418|Q1Q418_KUEST	Uncharacterized protein OS=Kuenenia stuttgartiensis OX=174633 GN=KSMBR1_4085 PE=3 SV=1	KUEST	1	1.1.1.10991.1	1	IDFTPYEHLNPVYT	IDFTPYEHLNPVYT	1	15216.4	5.24	-0.49
107	2.08	2.08	8.093	3.437	1.885	tr|Q1Q4Y9|Q1Q4Y9_KUEST	Uncharacterized protein OS=Kuenenia stuttgartiensis OX=174633 GN=KSMBR1_0307 PE=3 SV=1	KUEST	1	1.1.1.9086.1	1	LYDNPHIDFDDYYNSPR	LYDNPHIDFDDYYNSPR	1	102777	5.6	-0.285
108	2.06	2.06	34.74	17.84	6.573	tr|Q1Q691|Q1Q691_KUEST	Uncharacterized protein OS=Kuenenia stuttgartiensis OX=174633 GN=KSMBR1_3325 PE=4 SV=1	KUEST	1	1.1.1.11356.1	1	AAGLDDDDIENIFR	AAGLDDDDIENIFR	1	23091.7	5.92	0.061
109	2	12.99	43.48	43.48	37.39	tr|Q30JB5|Q30JB5_KUEST	Cytochrome c-552 Ks_3358 OS=Kuenenia stuttgartiensis OX=174633 GN=kustc0563 PE=1 SV=1	KUEST	16	1.1.1.10212.1;1.1.1.12992.1;1.1.1.9852.1;1.1.1.7213.1;1.1.1.7254.1;1.1.1.8717.1;1.1.1.10277.1;1.1.1.935.1;1.1.1.11653.1;1.1.1.8729.1;1.1.1.11704.1;1.1.1.4915.1;1.1.1.9658.1;1.1.1.11442.1;1.1.1.10575.1;1.1.1.3377.1;1.1.1.3270.1;1.1.1.9277.1;1.1.1.8624.1;1.1.1.10244.1	20	IIEQINEGTPEMMMPFK(Deamidated(N)@6);QINEGTPEMMMPFK(Oxidation(M)@11);KFADAEWQ;EGTPEMMMPFK;QINEGTPEMMMPFKEK(Oxidation(M)@9);IIEQINEGTPEMMMPFK(Oxidation(M)@13; Oxidation(M)@14);IIEQINEGTPEMMMPF;IIEQINEGTPEMMMPFK(Oxidation(M)@14);IIEQINEGTPEMMMPFKEK;LTPEEVKALVPVVR(Carbamyl(K)@7);KFADAEWQAK(Dioxidation(W)@7);IIEQINEGTPEMMMPFKEK(Oxidation(M)@12);QINEGTPEMMMPFKEK;KFADAEWQAK;IIEQINEGTPEMMMPFK(Deamidated(N…	LTPEEVKALVPVVR(Carbamyl(K)@7)	1	12639.60	7.76	-0.283
110	2	2	12.84	4.098	4.098	tr|Q1PVD8|Q1PVD8_KUEST	Beta sliding clamp OS=Kuenenia stuttgartiensis OX=174633 GN=dnaN PE=3 SV=1	KUEST	1	1.1.1.11361.1	1	IFGDTIIMVGSDMNR	IFGDTIIMVGSDMNR	1	40053	4.92	0.034
111	2	2	7.282	4.854	4.854	tr|Q1Q1Q1|Q1Q1Q1_KUEST	Strongly similar to thiamin biosynthesis protein ThiC OS=Kuenenia stuttgartiensis OX=174633 GN=thiC PE=4 SV=1	KUEST	1	1.1.1.10158.1	1	AAEEAGADAVMDLSTGGELR	AAEEAGADAVMDLSTGGELR	1	45036.7	5.66	-0.14
112	2	2	15.67	8.955	8.955	tr|Q1PVQ3|Q1PVQ3_KUEST	Similar to small heat shock protein OS=Kuenenia stuttgartiensis OX=174633 GN=hsp PE=3 SV=1	KUEST	1	1.1.1.12644.1	1	MSDGILTIILPK	MSDGILTIILPK	1	15242.4	5.78	-0.437
113	2	2	7.348	4.792	4.792	tr|Q1PVP9|Q1PVP9_KUEST	Methylenetetrahydrofolate reductase OS=Kuenenia stuttgartiensis OX=174633 GN=metF PE=3 SV=1	KUEST	1	1.1.1.10118.1	1	YNVPGMDVPDEVMER	YNVPGMDVPDEVMER	1	34337.1	8.66	-0.131
114	2	2	3.898	2.881	2.881	tr|C0GFV3|C0GFV3_9FIRM	Aspartate--tRNA(Asp/Asn) ligase OS=Dethiobacter alkaliphilus AHT 1 OX=555088 GN=aspS PE=3 SV=1	9FIRM	1	1.1.1.11219.1	1	AYDLVLDGVEIGGGSLR	AYDLVLDGVEIGGGSLR	1	66966.6	5.03	-0.271
115	2	2	6.037	3.937	3.937	tr|A0A399ZHA7|A0A399ZHA7_9CHLR	Uncharacterized protein OS=Anaerolineae bacterium OX=2052143 GN=DCC54_06020 PE=4 SV=1	9CHLR	1	1.1.1.3015.1	1	INHDEYSANEEMYAK	INHDEYSANEEMYAK	1	41716.2	4.37	-0.077
116	2	2	5.054	5.054	5.054	tr|Q1Q6Y3|Q1Q6Y3_KUEST	Strongly similar to glucose-1-phosphate cytidylyltransferase OS=Kuenenia stuttgartiensis OX=174633 GN=rfbF PE=4 SV=1	KUEST	1	1.1.1.11187.1	1	VFDYIENDETIWER	VFDYIENDETIWER	1	31752.2	7.19	-0.399
117	2	2	6.117	6.117	6.117	tr|Q1PV37|Q1PV37_KUEST	Strongly similar to pleiotrophic regulatory protein DegT OS=Kuenenia stuttgartiensis OX=174633 GN=degT PE=3 SV=1	KUEST	1	1.1.1.11006.1	1	NLGAYGDGGLVTANDDEMGALIK	NLGAYGDGGLVTANDDEMGALIK	1	41439.59	5.62	-0.03
118	2	2	3.052	3.052	3.052	tr|A0A3N5SGI1|A0A3N5SGI1_9CHLR	Peptide ABC transporter substrate-binding protein OS=Chloroflexi bacterium OX=2026724 GN=EHM40_05515 PE=4 SV=1	9CHLR	1	1.1.1.9579.1	1	ALLDEAGWVDSNGDGTR(Deamidated(N)@12)	ALLDEAGWVDSNGDGTR(Deamidated(N)@12)	1	62644.7	4.08	-0.315
119	1.92	1.92	7.075	2.201	2.201	tr|Q1PZN3|Q1PZN3_KUEST	Chaperone protein HtpG OS=Kuenenia stuttgartiensis OX=174633 GN=HtpG PE=3 SV=1	KUEST	1	1.1.1.8564.1	1	GVVDSSDIPLNISR	GVVDSSDIPLNISR	1	73277	5.66	-0.448
120	1.86	1.86	8.194	3.338	1.973	tr|Q1PZY3|Q1PZY3_KUEST	Similar to NADH oxidase OS=Kuenenia stuttgartiensis OX=174633 GN=kustd1906 PE=4 SV=1	KUEST	1	1.1.1.8690.1	1	VTEIGSDYIVISR	VTEIGSDYIVISR	1	72420.4	6.17	-0.099
121	1.85	1.85	3.406	3.406	3.406	tr|Q1Q435|Q1Q435_KUEST	Uncharacterized protein OS=Kuenenia stuttgartiensis OX=174633 GN=KSMBR1_4060 PE=4 SV=1	KUEST	1	1.1.1.4507.1	1	DMGESSHIDFR	DMGESSHIDFR	1	35445.9	6.42	-0.011
122	1.69	1.69	18.5	18.5	11.01	tr|Q1Q6F1|Q1Q6F1_KUEST	Uncharacterized protein OS=Kuenenia stuttgartiensis OX=174633 GN=KSMBR1_3372 PE=4 SV=1	KUEST	2	1.1.1.6228.1;1.1.1.10468.1	2	KGSVVADIGAGSGY;LPEELVINELK	KGSVVADIGAGSGY;LPEELVINELK	2	25588.2	6.34	0.018
123	1.59	1.59	33.33	20.83	10.83	tr|Q1Q245|Q1Q245_KUEST	50S ribosomal protein L19 OS=Kuenenia stuttgartiensis OX=174633 GN=RPL19 PE=3 SV=1	KUEST	1	1.1.1.9237.1	1	MNVIDVIEKEHMK	MNVIDVIEKEHMK	1	13715.1	10.12	-0.602
124	1.58	1.58	11.85	9.059	4.181	tr|Q1Q680|Q1Q680_KUEST	Strongly similar to pyruvate synthase beta chain OS=Kuenenia stuttgartiensis OX=174633 GN=KSMBR1_3320 PE=4 SV=1	KUEST	1	1.1.1.1838.1	1	VNDDESYNPEDR	VNDDESYNPEDR	1	31877.5	5.69	-0.175
126	1.48	1.48	6.897	4.828	4.828	tr|I3IQY1|I3IQY1_9BACT	ATP phosphoribosyltransferase OS=Candidatus Jettenia caeni OX=247490 GN=hisG PE=3 SV=1	9BACT	1	1.1.1.10954.1	1	GIIDAGLTGADWVK	GIIDAGLTGADWVK	1	32081.2	6.38	-0.098
127	1.32	1.32	10.59	7.059	7.059	tr|N9QJ51|N9QJ51_9GAMM	Uncharacterized protein OS=Acinetobacter sp. CIP 64.7 GN=F890_01932 PE=4 SV=1	9GAMM	1	1.1.1.3632.1	1	MSEKQLEVHLNK	MSEKQLEVHLNK	1	19542.58	8.96	-0.478

## Sheet: Quartz Tween-Protein Locations
Phylum	ID	Subcellular Localization								Subcellular Localization
Planctomycetes	A0A2C9CHN2	Cell inner membrane. Extracell.								Fimbrium	2	0.0120482
Planctomycetes	A0A2C9CHM2	Cytoplasm.								Cell inner membrane	44	0.26506
Planctomycetes	Q1PYU4	Fimbrium.								Extracell	10	0.060241
Planctomycetes	Q1PYC5	Cell inner membrane. Periplasm.								Periplasm	22	0.13253
Planctomycetes	Q1Q0T3	Periplasm.								Cytoplasm	86	0.518072
Planctomycetes	Q1PX48	Periplasm.								Cell outer membrane	2	0.0120482
Planctomycetes	Q1PZD8	Periplasm.
Planctomycetes	Q1PVE0	Cytoplasm.
Planctomycetes	Q1PYI0	Cell inner membrane.
Planctomycetes	Q1Q516	Periplasm.
Planctomycetes	Q1PZD5	Periplasm.
Planctomycetes	Q1PY43	Cytoplasm.
Planctomycetes	Q1Q7P4	Cytoplasm.
Planctomycetes	Q1PYY4	Periplasm.
Planctomycetes	Q1Q2Z1	Cytoplasm.
Planctomycetes	A0A2C9CBQ3	Cytoplasm.
Planctomycetes	Q1Q2G7	Cytoplasm. Extracell. Periplasm.
Planctomycetes	Q1PVE1	Cell inner membrane. Cytoplasm. Periplasm.
Planctomycetes	Q1PYY3	Cell inner membrane.
Planctomycetes	Q1PYX3	Cell inner membrane. Cytoplasm.
Planctomycetes	A0A2C9CIZ4	Cytoplasm. Fimbrium. Periplasm.
Planctomycetes	Q1PYI1	Cell inner membrane. Cytoplasm.
Planctomycetes	Q1PXW0	Cytoplasm.
Planctomycetes	Q1Q0T5	Periplasm.
Planctomycetes	Q1PYX6	Cell inner membrane. Cytoplasm.
Planctomycetes	Q1PY41	Cytoplasm.
Planctomycetes	Q1PZK4	Cytoplasm.
Planctomycetes	Q1PZD4	Cell inner membrane. Cytoplasm. Periplasm.
Planctomycetes	Q1Q794	Cytoplasm.
Planctomycetes	Q1Q4G9	Cell inner membrane. Extracell.
Planctomycetes	A0A2C9CKA3	Cytoplasm.
Planctomycetes	Q1Q4M6	Cell inner membrane.
Planctomycetes	Q1PUP9	Cytoplasm.
Planctomycetes	Q1PW50	Cytoplasm.
Planctomycetes	Q1Q315	Cytoplasm.
Planctomycetes	Q1PVQ6	Cell inner membrane. Extracell.
Planctomycetes	A0A2C9CF55	Cytoplasm.
Planctomycetes	Q1PZX1	Cell outer membrane.
Planctomycetes	Q1Q7J1	Cell inner membrane. Periplasm.
Planctomycetes	A0A2C9CLM3	Extracell.
Planctomycetes	Q1Q419	Cytoplasm.
Planctomycetes	Q1Q2X6	Cytoplasm.
Planctomycetes	Q1PVQ5	Cell inner membrane. Cytoplasm.
Planctomycetes	Q1PV11	Cytoplasm.
Planctomycetes	Q1Q539	Cytoplasm.
Planctomycetes	Q1Q1M6	Cytoplasm.
Planctomycetes	Q1PZD9	Extracell.
Planctomycetes	Q1PZE4	Cytoplasm.
Planctomycetes	Q1PZD3	Cytoplasm.
Planctomycetes	Q1PY52	Cytoplasm.
Planctomycetes	Q1PXZ5	Cytoplasm.
Planctomycetes	A0A2C9CAZ0	Extracell.
Planctomycetes	Q1PWU1	Cytoplasm.
Planctomycetes	A0A2C9CJW6	Cytoplasm.
Planctomycetes	Q1Q3L8	Cell inner membrane. Extracell.
Planctomycetes	Q1Q2R6	Cell inner membrane. Cytoplasm.
Planctomycetes	Q1PUL7	Cell inner membrane. Cytoplasm.
Planctomycetes	Q1PV82	Cytoplasm.
Planctomycetes	A0A2C9CC12	Cytoplasm.
Nitrospirae	A0A3A0C1H5	Periplasm.
Planctomycetes	Q1Q303	Cytoplasm.
Planctomycetes	Q1PY42	Cytoplasm.
Planctomycetes	A0A2C9CK93	Cell inner membrane. Cytoplasm.
Planctomycetes	Q1Q048	Cytoplasm.
Planctomycetes	Q1Q2X4	Cell inner membrane.
Planctomycetes	Q1Q6L7	Cell inner membrane.
Planctomycetes	Q1PYT0	Cytoplasm.
Planctomycetes	Q1Q354	Cell inner membrane. Cytoplasm.
Nitrospirae	A0A3A0BSV0	Cell inner membrane.
Planctomycetes	Q1Q2R8	Cytoplasm.
Planctomycetes	A0A2C9CFB6	Cytoplasm.
Planctomycetes	Q1Q7P0	Cytoplasm.
Planctomycetes	Q1PUP8	Cell inner membrane.
Planctomycetes	Q1PZ48	Cytoplasm.
Planctomycetes	Q1PVE9	Cell inner membrane. Cytoplasm.
Planctomycetes	Q1PUX6	Cell inner membrane. Cytoplasm.
Planctomycetes	Q1Q2Y9	Cytoplasm.
Planctomycetes	Q1Q0I8	Cytoplasm.
Planctomycetes	A0A2C9CJB5	Cell inner membrane.
Planctomycetes	Q1Q4Z5	Cytoplasm.
Chloroflexi	A0A399ZDQ8	Periplasm.
Chloroflexi	A0A136KPN5	Periplasm.
Nitrospirae	A0A3A0C2T3	Periplasm.
Planctomycetes	Q1PVK4	Cell inner membrane. Cytoplasm.
Planctomycetes	Q1Q0K5	Cell inner membrane. Cell outer membrane. Cytoplasm. Extracell. Periplasm.
Planctomycetes	Q1Q1N9	Cell inner membrane. Cytoplasm.
Planctomycetes	Q1Q0Z6	Cell inner membrane. Extracell.
Planctomycetes	Q1Q7N9	Cytoplasm.
Planctomycetes	Q1PUK7	Cell inner membrane. Cytoplasm.
Planctomycetes	A0A1G2ZGG2	Cell inner membrane. Cytoplasm.
Planctomycetes	Q1Q2X3	Cell inner membrane. Cytoplasm.
Planctomycetes	Q1Q0K4	Cell inner membrane.
Planctomycetes	Q1Q6P8	Cytoplasm.
Planctomycetes	Q1PVC6	Cytoplasm.
Planctomycetes	Q1PYD6	Cell inner membrane.
Planctomycetes	Q1Q6Y1	Cytoplasm.
Planctomycetes	Q1PYP7	Cell inner membrane.
Planctomycetes	Q1PXG5	Cytoplasm.
Planctomycetes	Q1Q3M3	Cytoplasm.
Planctomycetes	Q1Q3V0	Cytoplasm.
Planctomycetes	Q1Q131	Cell inner membrane.
Planctomycetes	Q1PVM6	Cytoplasm.
Planctomycetes	Q1PYX4	Cytoplasm.
Planctomycetes	A0A2C9CFF5	Cytoplasm.
Planctomycetes	Q1PYX7	Cell inner membrane. Cytoplasm.
Planctomycetes	Q1Q418	Cytoplasm.
Planctomycetes	Q1Q4Y9	Cytoplasm. Periplasm.
Planctomycetes	Q1Q691	Cytoplasm.
Planctomycetes	Q30JB5	Periplasm.
Planctomycetes	Q1PVD8	Cytoplasm.
Planctomycetes	Q1Q1Q1	Cell inner membrane. Cytoplasm.
Planctomycetes	Q1PVQ3	Cell inner membrane.
Planctomycetes	Q1PVP9	Cell inner membrane. Cytoplasm.
Firmicutes	C0GFV3	Cytoplasm.
Chloroflexi	A0A399ZHA7	Periplasm.
Planctomycetes	Q1Q6Y3	Cytoplasm.
Planctomycetes	Q1PV37	Cytoplasm.
Chloroflexi	A0A3N5SGI1	Periplasm.
Planctomycetes	Q1PZN3	Cell inner membrane. Cytoplasm.
Planctomycetes	Q1PZY3	Cytoplasm.
Planctomycetes	Q1Q435	Cytoplasm.
Planctomycetes	Q1Q6F1	Cytoplasm.
Planctomycetes	Q1Q245	Cell inner membrane. Cytoplasm.
Planctomycetes	Q1Q680	Cytoplasm.
Planctomycetes	I3IQY1	Cytoplasm.
Proteobacteria	N9QJ51	Cell inner membrane.
